1 **The *Mycobacterium tuberculosis* Phosphate-Sensing Pst/SenX3-RegX3 System**  
2 **Regulates ESX-5 Secretion to Evade Host Immunity**

3

4 Sarah R. Elliott<sup>1\*</sup>, Dylan W. White<sup>1</sup> and Anna D. Tischler<sup>1#</sup>

5 <sup>1</sup>Department of Microbiology and Immunology, University of Minnesota, Minneapolis, MN, USA

6

7 Running title: Regulation of *M. tuberculosis* ESX-5 Secretion

8

9 # Corresponding author: Anna D. Tischler, [tischler@umn.edu](mailto:tischler@umn.edu)

10 \* Present address: DiaSorin, Stillwater, MN

11 S.R.E. and D.W.W. contributed equally to this work.

12

13 Keywords: Type VII secretion, ESX secretion, regulation, two component system

14

## 15 **ABSTRACT**

16 The *Mycobacterium tuberculosis* Type VII secretion system ESX-5, which has been implicated  
17 in virulence, is activated at the transcriptional level by the phosphate starvation responsive  
18 Pst/SenX3-RegX3 signal transduction system. Deletion of *pstA1*, which encodes a Pst  
19 phosphate transporter component, causes constitutive activation of the response regulator  
20 RegX3, hyper-secretion of ESX-5 substrates and attenuation in the mouse infection model. We  
21 hypothesized that constitutive activation of ESX-5 secretion causes attenuation of the  $\Delta pstA1$   
22 mutant. To test this, we uncoupled ESX-5 from regulation by RegX3. Using electrophoretic  
23 mobility shift assays, we defined a RegX3 binding site in the *esx-5* locus. Deletion or mutation of  
24 the RegX3 binding site reversed hyper-secretion of the ESX-5 substrate EsxN by the  $\Delta pstA1$   
25 mutant and abrogated induction of EsxN secretion in response to phosphate limitation by wild-  
26 type *M. tuberculosis*. Deletion of the *esx-5* RegX3 binding site ( $\Delta BS$ ) suppressed attenuation of  
27 the  $\Delta pstA1$  mutant in *Irgm1*<sup>-/-</sup> mice, suggesting that constitutive ESX-5 secretion limits *M.*  
28 *tuberculosis* evasion of host immune responses that are independent of *Irgm1*. However, the  
29  $\Delta pstA1\Delta BS$  mutant remained attenuated in both *NOS2*<sup>-/-</sup> and C57BL/6 mice, suggesting that  
30 factors other than ESX-5 secretion also contribute to attenuation of the  $\Delta pstA1$  mutant. In  
31 addition, a  $\Delta pstA1\Delta esxN$  mutant lacking the hyper-secreted ESX-5 substrate EsxN remained  
32 attenuated in *Irgm1*<sup>-/-</sup> mice, suggesting that ESX-5 substrates other than EsxN cause increased  
33 susceptibility to host immunity. Our data indicate that while *M. tuberculosis* requires ESX-5 for  
34 virulence, it tightly controls secretion of ESX-5 substrates to avoid elimination by host immune  
35 responses.

## 36 **INTRODUCTION**

37 Pathogenic bacteria often regulate the activity of specialized protein secretion systems  
38 that are required for virulence to ensure release of secreted effectors only at the appropriate  
39 stage of infection. Tight control of secretion system activity may limit recognition by the host  
40 immune system or prevent expression of complex secretion machines that restrict growth (1, 2).

41 *Mycobacterium tuberculosis*, the causative agent of tuberculosis, encodes five Type VII or ESX  
42 specialized protein secretion systems, of which ESX-1, ESX-3 and ESX-5 have been shown to  
43 promote pathogenesis (3). *M. tuberculosis* regulates activity of each of these secretion systems  
44 in response to signals encountered in the host. Iron limitation activates ESX-3 (4), which plays a  
45 role in both iron scavenging and inhibiting phagosome maturation (5, 6). ESX-1 permeabilizes  
46 the phagosomal membrane to allow bacterial access to the host cell cytoplasm (7-9). ESX-1  
47 secretion is regulated by two signal transduction systems, PhoPR and MprAB, that respond to  
48 acidic pH and cell wall stress, respectively, signals that *M. tuberculosis* encounters in the  
49 phagosome (10-13). We recently demonstrated that *M. tuberculosis* activates ESX-5 secretion  
50 in response to inorganic phosphate ( $P_i$ ) limitation (14). RegX3, a response regulator activated  
51 during  $P_i$  limitation, directly activates transcription of a subset of *esx-5* genes leading to  
52 increased production of ESX-5 secretion system core components and enhanced secretion of  
53 the EsxN and PPE41 substrates (14).

54         Though the precise function of ESX-5 remains unclear, it appears to influence nutrient  
55 acquisition to enable *M. tuberculosis* replication (15-17) and to promote host cell necrosis by  
56 activating the inflammasome and stimulating IL-1 $\beta$  secretion (18, 19). In the related pathogen  
57 *Mycobacterium marinum*, ESX-5 secretes most proteins that belong to the mycobacteria-  
58 specific PE and PPE protein families (16, 20). The *M. tuberculosis* PE and PPE proteins are  
59 strongly immunogenic in mice; immune responses to PE and PPE antigens depend on a  
60 functional ESX-5 secretion system, suggesting that *M. tuberculosis* also secretes many PE and  
61 PPE proteins via ESX-5 (21). ESX-5 is also likely to be active during infection since T cells  
62 specific for the ESX-5 substrate EsxN have been detected in humans with latent tuberculosis  
63 (22, 23).

64         Activation of the RegX3 response regulator and induction of ESX-5 secretion is inhibited  
65 during growth in  $P_i$ -replete conditions by the Pst  $P_i$  uptake system (24). Deletion of *pstA1*, which  
66 encodes a Pst system trans-membrane component, causes constitutive activation of RegX3,

67 constitutive expression of *esx-5* genes, and hyper-secretion of ESX-5 substrates, independent  
68 of P<sub>i</sub> availability (14). We previously demonstrated that a  $\Delta$ *pstA1* mutant is attenuated during the  
69 chronic phase of infection in wild-type C57BL/6 mice and exhibits strongly reduced replication  
70 and virulence in two immune-deficient strains of mice, NOS2<sup>-/-</sup> and Irgm1<sup>-/-</sup>, that fail to control  
71 infection with wild-type *M. tuberculosis* (24). NOS2<sup>-/-</sup> mice lack the interferon-gamma (IFN- $\gamma$ )  
72 inducible nitric oxide synthase that generates toxic reactive nitrogen species (25). Although  
73 NOS2<sup>-/-</sup> mice are assumed to have a cell-intrinsic defect in their ability to control *M. tuberculosis*  
74 replication (26), they also fail to inhibit neutrophil recruitment to the lung, which creates a  
75 nutrient-rich environment that enhances *M. tuberculosis* replication (27, 28). Irgm1 encodes an  
76 IFN- $\gamma$  inducible GTPase that was originally described to restrict *M. tuberculosis* replication in a  
77 cell-intrinsic manner by mediating phagosome acidification, possibly via induction of autophagy  
78 (29, 30). However, Irgm1 is also required for hematopoietic stem cell renewal (31); Irgm1<sup>-/-</sup> mice  
79 become leukopenic upon infection with intracellular pathogens, including mycobacteria (32),  
80 which also likely contributes to their profound susceptibility to infection. We previously  
81 demonstrated that attenuation of the  $\Delta$ *pstA1* mutant in NOS2<sup>-/-</sup> mice was due to the constitutive  
82 activation of RegX3; a  $\Delta$ *pstA1* $\Delta$ *regX3* double mutant progressively replicated in the lungs and  
83 caused death of the animals (24). It remains unclear whether constitutive activation of RegX3  
84 similarly contributes to attenuation of the  $\Delta$ *pstA1* mutant in either Irgm1<sup>-/-</sup> or C57BL/6 mice,  
85 because a  $\Delta$ *regX3* single mutant was also attenuated in these mouse strains (24).

86 We hypothesized that constitutive activation of *esx-5* transcription and hyper-secretion of  
87 ESX-5 substrates driven by constitutively activated RegX3 causes virulence attenuation of the  
88  $\Delta$ *pstA1* mutant. *M. tuberculosis* requires ESX-5 for replication *in vitro* (15, 33), so we were  
89 unable to construct mutants lacking ESX-5 function to test this possibility. Instead, we took a  
90 targeted approach to uncouple ESX-5 from regulation by RegX3. We defined the RegX3 binding  
91 site in the *esx-5* locus and generated targeted mutations that disrupt RegX3 binding. Mutation of  
92 the RegX3 binding site prevented induction of *esx-5* gene expression and ESX-5 secretion

93 during P<sub>i</sub> limitation by wild-type *M. tuberculosis*, and reversed the over-expression of *esx-5*  
94 genes and hyper-secretion the ESX-5 substrate EsxN by the  $\Delta pstA1$  mutant. Deletion of the  
95 *esx-5* RegX3 binding site also suppressed attenuation of the  $\Delta pstA1$  mutant specifically in  
96 *Irgm1*<sup>-/-</sup> mice. Our results suggest hyper-secretion of ESX-5 substrates sensitizes *M.*  
97 *tuberculosis* to a host immune response that is independent of *Irgm1* and that *M. tuberculosis*  
98 regulates ESX-5 secretion in response to P<sub>i</sub> availability in the host to evade this host immune  
99 response.

100

## 101 RESULTS

102 **Defining a RegX3 binding site in the *esx-5* locus.** We previously demonstrated that RegX3  
103 directly regulates ESX-5 activity at the transcriptional level via binding to a 125 bp sequence  
104 within the *ppe27-pe19* intergenic region in the *esx-5* locus (Fig. 1A) (14). RegX3 was not  
105 included in a prior study that mapped the binding sites of most *M. tuberculosis* transcription  
106 factors (34), so a RegX3 consensus binding sequence has yet to be described. To more  
107 precisely define the *esx-5* RegX3 binding site, we conducted competitive electrophoretic  
108 mobility shift assays (EMSAs) using purified recombinant His<sub>6</sub>-RegX3. Our previous work  
109 demonstrated that RegX3 binds within the sequence -151 to -27 bp relative to the *pe19* start  
110 codon (Probe A, Fig. 1A and 1B) (14). Binding reactions including excess unlabeled competitors  
111 comprising the 5' (-151 to -91) or 3' (-90 to -28) halves of Probe A demonstrated that RegX3  
112 binds to the 5' region; only addition of the 5' competitor resulted in reversal of the mobility shift  
113 (Fig. 1B). These data indicate that RegX3 binds within -151 to -91 bp relative to the *pe19* start  
114 codon.

115 To further define the *esx-5* RegX3 binding site, we performed additional competitive  
116 EMSAs using the 61 bp -151 to -91 segment as the labeled probe (Fig. 1A and 1C, 5' Probe)  
117 and a series of unlabeled competitors that truncate the 5' Probe sequence at either the 5' or 3'  
118 end, added in excess. A complete list of competitors tested and their ability to compete with the

119 5' Probe for RegX3 binding is provided in Table S1. Competitors that defined the 5' and 3' ends  
120 of the RegX3 binding site are shown (Fig. 1C). Excess unlabeled Competitor 1, which truncates  
121 the 5' Probe at the 5' end, reversed the mobility shift, indicating that RegX3 binds to this  
122 competitor (Fig. 1C and 1D). However, RegX3 did not bind Competitor 2, which truncates an  
123 additional three bp at the 5' end, since the mobility shift was unperturbed (Fig. 1C and 1D),  
124 indicating that one or more base pairs removed from Competitor 2 are essential for RegX3  
125 binding. Therefore, the 5' end of the RegX3 binding site is located near position -128 relative to  
126 the *pe19* start codon. Similarly for the 3' end, excess Competitor 3 reversed the mobility shift,  
127 indicating RegX3 can bind to this sequence, but excess Competitor 4, which eliminates an  
128 additional three bp from the 3' end, failed to alter the mobility shift (Fig. 1C and 1D). These data  
129 demonstrate that the three bp removed from Competitor 4 relative to Competitor 3 are required  
130 for RegX3 binding, and thus define the 3' end of the RegX3 binding site at -102 relative to the  
131 *pe19* start codon. Collectively, our data indicate that RegX3 binds to a 27 bp sequence located  
132 at -128 to -102 relative to the *pe19* start codon in the *esx-5* locus.

133 **Defining essential sequence elements for RegX3 binding *in vitro*.** RegX3 is a member of  
134 the OmpR/PhoB family of winged helix-turn-helix response regulators that typically bind to direct  
135 repeat DNA sequences (35). We previously identified an imperfect direct repeat separated by a  
136 5 bp spacer in the 5' Probe sequence (DR1 and DR2, Fig. 1C) (14). Further examination  
137 revealed a third imperfect direct repeat (DR3) 5' of the first two and separated from DR1 by a 6  
138 bp spacer (Fig. 1C). All three direct repeats are contained within the -128 to -102 region relative  
139 to the *pe19* start codon. To determine if these sequence elements are required for RegX3  
140 binding, EMSAs were performed using competitor DNA harboring mutations in the individual  
141 direct repeats or spacer elements. For each direct repeat element, all five bp of the direct repeat  
142 were altered by transversion (Fig. 1C). We altered the spacer sequence between DR1 and DR2  
143 by either adding or removing three base pairs (Spc+3 and Spc-3, respectively, Fig. 1C). Each  
144 mutated unlabeled competitor was tested for the ability to compete with the 5' probe for binding

145 to RegX3 when added in excess. The mutated DR3 competitor reversed the mobility shift,  
146 indicating RegX3 can still bind this sequence (Fig. 1E). However, the mutated DR1 or DR2  
147 competitors both failed to reverse the mobility shift, indicating that RegX3 cannot bind these  
148 mutated sequences (Fig. 1E). These data indicate that the DR1 and DR2 sequence elements  
149 are required for RegX3 binding *in vitro*. Altering the spacing between DR1 and DR2, either by  
150 adding or removing 3 bp, abrogates RegX3 binding, since the Spc+3 and Spc-3 competitors  
151 also failed to reverse the mobility shift (Fig. 1E). This indicates that RegX3 requires a 5 bp  
152 spacer between DR1 and DR2 for *in vitro* binding. The 27 bp RegX3 binding site sequence,  
153 including DR1 and DR2, located approximately 100 bp upstream of the *pe19* start codon is  
154 consistent with RegX3 functioning as a transcriptional activator of *esx-5* genes (14).

155 **RegX3 binding site mutations in the  $\Delta pstA1$  mutant reverse *esx-5* over-expression and**  
156 **hyper-secretion of EsxN.** We previously demonstrated that *esx-5* transcripts are over-  
157 expressed during growth in  $P_i$ -replete conditions in the  $\Delta pstA1$  mutant due to constitutive  
158 activation of RegX3 (14). To determine if *esx-5* over-expression also depends upon the *esx-5*  
159 RegX3 binding site that we defined, we introduced three distinct RegX3 binding site mutations  
160 at the intergenic region 5' of *pe19* on the chromosome of the *M. tuberculosis*  $\Delta pstA1$  mutant.  
161 The DR2 direct repeat mutant ( $\Delta pstA1_{DR2}$ ) harbors the transversion mutations in DR2 identical  
162 those tested for RegX3 binding *in vitro* (Fig. 1C). The spacer mutant ( $\Delta pstA1_{Spc+3}$ ) harbors three  
163 additional bp between DR1 and DR2, identical to the Spc+3 mutation tested for RegX3 binding  
164 *in vitro* (Fig. 1C). Finally, the binding site deletion mutant ( $\Delta pstA1_{\Delta BS}$ ) harbors a deletion of the  
165 complete 27 bp RegX3 binding site located at -128 to -102 bp relative to the *pe19* start codon.  
166 We tested expression of *esx-5* genes in the  $\Delta pstA1_{DR2}$ ,  $\Delta pstA1_{Spc+3}$  and  $\Delta pstA1_{\Delta BS}$  binding site  
167 mutants grown in standard  $P_i$ -rich medium (Fig. 2A). The  $\Delta pstA1$  mutant exhibited significant  
168 over-expression of the *pe19* and *espG5* transcripts ( $P < 0.0001$ ) and more than 3-fold over-  
169 expression of *eccD5* as compared to the WT control (Fig. 2A). As previously reported, over-  
170 expression of these transcripts was dependent on RegX3 since expression of each gene was



171 restored to the WT level in the  $\Delta pstA1\Delta regX3$  mutant (Fig. 2A) (14). In both the  $\Delta pstA1_{DR2}$  and  
172  $\Delta pstA1\Delta BS$  mutants, transcription of *pe19*, *espG<sub>5</sub>*, and *eccD<sub>5</sub>* was similarly restored to levels  
173 that were nearly the same as and not significantly different from the WT control (Fig. 2A). Both  
174 the  $\Delta pstA1_{DR2}$  and  $\Delta pstA1\Delta BS$  mutants also exhibited statistically significant reductions in *pe19*  
175 and *espG<sub>5</sub>* transcription relative to the  $\Delta pstA1$  parental control (Fig. 2A). The *pe19*, *espG<sub>5</sub>*, and  
176 *eccD<sub>5</sub>* transcripts were detected at intermediate levels in the  $\Delta pstA1_{Spc+3}$  mutant that were not  
177 significantly reduced as compared to the  $\Delta pstA1$  parental strain (Fig. 2A). These data  
178 demonstrate that the RegX3 binding site within the *esx-5* locus, and the DR2 sequence in  
179 particular, is required for RegX3-mediated over-expression of *esx-5* genes in the  $\Delta pstA1$   
180 mutant.

181 RegX3 is a global response regulator that activates and represses many genes outside  
182 of the *esx-5* locus (24). To determine if the RegX3 binding site mutations that we introduced  
183 perturbed regulation exclusively at the *esx-5* locus, we examined transcription of other genes  
184 that are over-expressed by the  $\Delta pstA1$  mutant in a RegX3-dependent manner, but that are not  
185 associated with *esx-5* (24). The *udgA* and *mgtA* transcripts were over-expressed by the  $\Delta pstA1$   
186 mutant relative to both the WT and  $\Delta pstA1\Delta regX3$  strains (Fig. S1). Both *udgA* and *mgtA*  
187 transcripts remained significantly over-expressed in the  $\Delta pstA1_{DR2}$ ,  $\Delta pstA1_{Spc+3}$  and  $\Delta pstA1\Delta BS$   
188 mutants (Fig. S1). These data demonstrate that mutation of the RegX3 binding site sequence  
189 within the *esx-5* locus does not globally alter RegX3 activity.

190 To determine if the decreased transcription of *esx-5* genes in the RegX3 binding site  
191 mutants translates to changes in stability or activity of the ESX-5 secretion system, we  
192 monitored production of ESX-5 conserved components and secretion of the ESX-5 substrates  
193 EsxN and PPE41 by the  $\Delta pstA1$  RegX3 binding site mutants. We observed hyper-secretion of  
194 the ESX-5 substrates EsxN and PPE41 and over-production of the cytosolic ESX-5 chaperone  
195 EspG<sub>5</sub> and ESX-5 secretion machinery components EccB<sub>5</sub> and EccD<sub>5</sub> by the  $\Delta pstA1$  mutant  
196 relative to the WT control (Fig. 2B). This response required RegX3 (Fig. 2B), consistent with our



197 prior report (14). We detected reduced amounts of the EspG<sub>5</sub>, EccB<sub>5</sub> and EccD<sub>5</sub> proteins in all  
198 three  $\Delta pstA1$  RegX3 binding site mutants as compared to the  $\Delta pstA1$  mutant (Fig. 2B). EsxN  
199 hyper-secretion was reversed in both the  $\Delta pstA1_{DR2}$  and  $\Delta pstA1\Delta BS$  mutants, reaching levels  
200 that were undetectable, comparable to both the WT and  $\Delta pstA1\Delta regX3$  mutant controls (Fig.  
201 2B). We detected EsxN secretion by the  $\Delta pstA1_{SpC+3}$  mutant but at a 6-fold reduced abundance  
202 as compared to the  $\Delta pstA1$  mutant (Fig. 2B). Secretion of PPE41 was also decreased in each of  
203 the RegX3 binding site mutants relative to the  $\Delta pstA1$  parental strain, but remained  
204 approximately 2-fold increased as compared to the WT control (Fig. 2B). It is possible either that  
205 RegX3 controls PPE41 secretion by a mechanism independent of its regulation of *esx-5*  
206 transcription, or that decreased secretion of EsxN frees the ESX-5 secretion apparatus to  
207 translocate other substrates including PPE41. The ModD control confirmed equivalent loading  
208 of the culture filtrate fraction; the GroEL2 control confirmed equivalent loading of the cell lysate  
209 fraction and demonstrated that cell lysis did not contaminate the culture filtrate (Fig. 2B). These  
210 results indicate that the RegX3 binding site in the *esx-5* locus is required for the over-production  
211 of ESX-5 secretion system core components and hyper-secretion of EsxN by the  $\Delta pstA1$   
212 mutant.

213 **Mutation of the RegX3 binding site in the *esx-5* locus prevents ESX-5 induction during**  
214 **phosphate limitation.** We previously demonstrated that P<sub>i</sub> limitation triggers ESX-5 activity in  
215 WT *M. tuberculosis*, and that this response requires RegX3 (14). To determine if the RegX3  
216 binding site is also required for induction of *esx-5* transcription in response to P<sub>i</sub> limitation, we  
217 generated a strain lacking the RegX3 binding site in the WT Erdman strain background ( $\Delta BS$ )  
218 and conducted qRT-PCR experiments to monitor *esx-5* gene expression. The WT,  $\Delta regX3$  and  
219  $\Delta BS$  strains were grown in either P<sub>i</sub>-free medium or P<sub>i</sub>-replete medium as a control. In P<sub>i</sub>-replete  
220 conditions, *esx-5* transcripts were expressed at a basal level in all of the strains (Fig. 3B).  
221 Statistically significant increases in *pe19* and *espG<sub>5</sub>* transcription were detected for the  $\Delta BS$   
222 mutant, but the changes were less than 1.5-fold (Fig. 3B). The *pe19*, *espG<sub>5</sub>* and *eccD<sub>5</sub>*

223 transcripts were induced 7.9, 4.9, and 3.7-fold, respectively, by WT *M. tuberculosis* during  
224 growth in P<sub>i</sub>-free medium relative to the P<sub>i</sub>-replete control (Fig. 3A). The  $\Delta$ regX3 mutant failed to  
225 induce *pe19*, *espG<sub>5</sub>* or *eccD<sub>5</sub>* transcription in response to P<sub>i</sub> limitation, consistent with our  
226 previous reports (Fig. 3A) (14, 36). The  $\Delta$ BS mutant similarly failed to induce *pe19*, *espG<sub>5</sub>* or  
227 *eccD<sub>5</sub>* transcription in response to P<sub>i</sub> limitation (Fig. 3A); the level of each transcript was  
228 significantly different from that of the WT control and not significantly different from that of the  
229  $\Delta$ regX3 mutant (Fig. 3A). These data demonstrate that the RegX3 binding site in the *esx-5* locus  
230 is required for activation of *esx-5* transcription in response to P<sub>i</sub> limitation.

231 We evaluated production of ESX-5 conserved components and secretion of the ESX-5  
232 substrates EsxN and PPE41 during P<sub>i</sub> limitation in the  $\Delta$ BS mutant by Western blotting.  
233 Production of EspG<sub>5</sub>, EccB<sub>5</sub> and EccD<sub>5</sub> was induced in WT *M. tuberculosis* during P<sub>i</sub> limitation  
234 (Fig. 3C), as previously demonstrated (14). Increased production or stability of EspG<sub>5</sub>, EccB<sub>5</sub>  
235 and EccD<sub>5</sub> during P<sub>i</sub> limitation was abrogated in both the  $\Delta$ regX3 and  $\Delta$ BS mutants (Fig. 3C).  
236 The GroEL2 control confirmed equivalent loading of cell lysate proteins (Fig. 3C). Secretion of  
237 EsxN and PPE41 was induced in the WT strain during P<sub>i</sub> limitation, as previously reported (14)  
238 (Fig. 3C). Induction of EsxN secretion during P<sub>i</sub> limitation was prevented by either the  $\Delta$ regX3 or  
239 the  $\Delta$ BS mutation (Fig. 3C). The  $\Delta$ regX3 mutant also exhibited modestly reduced PPE41  
240 secretion during P<sub>i</sub> limitation, as previously reported (14) (Fig. 3C). In contrast, the  $\Delta$ BS mutant  
241 induced PPE41 secretion during P<sub>i</sub> limitation similarly to the WT control (Fig. 3C), consistent  
242 with our results demonstrating intermediate PPE41 secretion by the  $\Delta$ pstA1 $\Delta$ BS mutant. The  
243 ModD control confirmed equivalent loading of the P<sub>i</sub>-limited culture filtrate fraction (Fig. 3C); the  
244 decreased secretion of ModD during P<sub>i</sub> limitation relative to the P<sub>i</sub>-replete control (Fig. 3C) was  
245 consistent with our previous report (14). The GroEL2 control confirmed that cell lysis did not  
246 contaminate the culture filtrate (Fig. 3C). Collectively, these data suggest that the RegX3  
247 binding site within the *esx-5* locus is necessary for induction of EsxN secretion during P<sub>i</sub>  
248 limitation.

249 **The *esx-5* RegX3 binding site deletion suppresses attenuation of the  $\Delta pstA1$  mutant in**  
250 ***Irgm1*<sup>-/-</sup> mice.**

251 To determine if constitutive hyper-secretion of ESX-5 substrates contributes to attenuation  
252 of the  $\Delta pstA1$  mutant we infected C57BL/6, *NOS2*<sup>-/-</sup> and *Irgm1*<sup>-/-</sup> mice via the aerosol route with  
253 ~100 CFU of WT,  $\Delta pstA1$ , or  $\Delta pstA1\Delta BS$  *M. tuberculosis* strains. All *Irgm1*<sup>-/-</sup> mice succumbed to  
254 infection with WT Erdman by 4 weeks post-infection, and bacterial loads reached over 10<sup>9</sup> in the  
255 lungs (Fig. 4A). *Irgm1*<sup>-/-</sup> mice controlled replication of the  $\Delta pstA1$  mutant after 2 weeks post  
256 infection (Fig. 4A), consistent with previous results (24). In contrast, the  $\Delta pstA1\Delta BS$  mutant  
257 replicated progressively in the lungs of *Irgm1*<sup>-/-</sup> mice. At 4 weeks post-infection, mean bacterial  
258 CFU in the lungs of *Irgm1*<sup>-/-</sup> mice infected with the  $\Delta pstA1\Delta BS$  mutant were increased 40-fold as  
259 compared to mice infected with the  $\Delta pstA1$  mutant, though this difference did not achieve  
260 statistical significance (Fig. 4A). However, by 6 weeks post-infection, the  $\Delta pstA1\Delta BS$  mutant  
261 reached nearly the same final bacterial burden in the lungs of *Irgm1*<sup>-/-</sup> mice as the WT control  
262 (Fig. 4A). At 6 weeks, the bacterial burden of the  $\Delta pstA1\Delta BS$  mutant in the lungs was over  
263 1000-fold higher than the  $\Delta pstA1$  mutant, and this difference was statistically significant (Fig.  
264 4A). In these experiments, several of the *Irgm1*<sup>-/-</sup> mice infected with the  $\Delta pstA1\Delta BS$  mutant were  
265 moribund at the 6 week time point, while our previous experiments demonstrated that *Irgm1*<sup>-/-</sup>  
266 mice infected with the  $\Delta pstA1$  mutant all survive for at least 14 weeks (24). These data suggest  
267 that attenuation of the  $\Delta pstA1$  mutant in *Irgm1*<sup>-/-</sup> mice is due, at least in part, to constitutive  
268 activity of the ESX-5 secretion system and increased secretion of one or more ESX-5  
269 substrates. These data further suggest that hyper-secretion of ESX-5 substrates sensitizes *M.*  
270 *tuberculosis* to a host immune response that is independent of *Irgm1*.

271 To determine if the modest attenuation of the  $\Delta pstA1\Delta BS$  mutant relative to the WT  
272 control might be due to the  $\Delta BS$  mutation, we performed similar aerosol infection experiments  
273 with the  $\Delta BS$  mutant. The  $\Delta BS$  mutant exhibited a modest but statistically significant decrease in  
274 lung bacterial burden at the 4 week time point compared to the WT control, but all mice were

275 moribund by the 5 week time point and were euthanized (Fig. 4A). These data suggest that the  
276 partially attenuated phenotype of the  $\Delta pstA1\Delta BS$  mutant in *Irgm1*<sup>-/-</sup> mice may be due to an  
277 inability to induce ESX-5 secretion in response to P<sub>i</sub> limitation.

278 In *NOS2*<sup>-/-</sup> mice, in contrast, the  $\Delta BS$  mutation had no statistically significant effect on the  
279 ability of either the  $\Delta pstA1$  mutant or WT bacteria to replicate in the lungs (Fig. 4B). These data  
280 suggest that other factors besides increased ESX-5 secretion contribute to the attenuation of  
281 the  $\Delta pstA1$  mutant in *NOS2*<sup>-/-</sup> mice.

282 Similarly, in C57BL/6 mice, deletion of the *esx-5* RegX3 binding site sequence failed to  
283 suppress the attenuated phenotype of the  $\Delta pstA1$  mutant during the chronic phase of infection  
284 (Fig. 4C). There were no statistically significant differences in lung bacterial burden between the  
285  $\Delta pstA1$  and  $\Delta pstA1\Delta BS$  mutants at any time point (Fig. 4C). In addition, at each time point the  
286 CFUs in the lungs of C57BL/6 mice infected with either the  $\Delta pstA1$  mutant or the  $\Delta pstA1\Delta BS$   
287 mutant were significantly different from the WT control (Fig. 4C). To determine if the  $\Delta BS$   
288 mutation causes attenuation, we infected C57BL/6 mice by the aerosol route with the  $\Delta BS$   
289 mutant. We observed modest but statistically significant decreases in lung bacterial burden at  
290 the 2 week and 4 week time points in  $\Delta BS$ -infected mice relative to mice infected with the WT  
291 control (Fig. 4C). However, by 12 weeks post-infection, CFU in the lungs of both WT- and  $\Delta BS$ -  
292 infected mice were similar (Fig. 4C). Taken together, these data suggest that other factors  
293 besides increased ESX-5 secretion contribute to attenuation of the  $\Delta pstA1$  mutant during the  
294 chronic phase of infection in C57BL/6 mice and that regulation of ESX-5 secretion in response  
295 to P<sub>i</sub> limitation enhances acute phase replication of *M. tuberculosis* in the lungs.

#### 296 **EsxN hyper-secretion does not cause attenuation of the $\Delta pstA1$ mutant.**

297 To investigate whether attenuation of the  $\Delta pstA1$  mutant is due to inappropriate hyper-  
298 secretion of the ESX-5 substrate EsxN specifically, we deleted *esxN* in both WT and  $\Delta pstA1$   
299 mutant backgrounds. The  $\Delta esxN$  deletion was verified by PCR (data not shown) and qRT-PCR;  
300 the *esxN* transcript was not detected in either  $\Delta esxN$  mutant (Fig. 5A). Deletion of *esxN* did not

301 alter abundance of the downstream *espG<sub>5</sub>* transcript in either the WT or  $\Delta$ *pstA1* mutant  
302 background (Fig. 5A), suggesting that the  $\Delta$ *esxN* deletion is not polar. To verify that EsxN is not  
303 produced or secreted by the  $\Delta$ *esxN* and  $\Delta$ *pstA1 $\Delta$ *esxN* mutants, we performed Western blots.  
304 While secreted EsxN was not detected in either the WT or  $\Delta$ *esxN* strains, a protein or proteins  
305 that reacted with our anti-EsxN anti-serum was still detected in the secreted fraction of the  
306  $\Delta$ *pstA1 $\Delta$ *esxN* mutant, though at a decreased level compared to the  $\Delta$ *pstA1* parental control  
307 (Fig. 5B). These data suggest that while EsxN itself is hyper-secreted by the  $\Delta$ *pstA1* mutant, our  
308 anti-EsxN anti-serum also detects one or more of the four EsxN paralogs encoded outside the  
309 *esx-5* locus that each exhibit >92.5% amino acid sequence identity with EsxN (37). Similar  
310 cross-reactivity of anti-EsxN anti-serum was previously described (17). Our data further suggest  
311 that secretion of one or more of these EsxN paralogs is also increased in the  $\Delta$ *pstA1* mutant.**

312 We performed additional Western blots to verify that the  $\Delta$ *esxN* deletion did not alter  
313 production of ESX-5 core components. Because co-dependent secretion of substrates has been  
314 observed for the ESX-1 secretion system (38-40), we also examined if deletion of *esxN* altered  
315 PPE41 secretion. Deletion of *esxN* in WT *M. tuberculosis* did not change production of the ESX-  
316 5 proteins EspG<sub>5</sub> or EccB<sub>5</sub>, but did cause an increase in PPE41 secretion (Fig. 5B). It is  
317 possible that in the absence of EsxN, other ESX-5 substrates like PPE41 are more efficiently  
318 secreted. Both EspG<sub>5</sub> and EccB<sub>5</sub> were also produced at similar levels in the  $\Delta$ *pstA1 $\Delta$ *esxN*  
319 double mutant compared to the  $\Delta$ *pstA1* mutant (Fig. 5B). The  $\Delta$ *pstA1 $\Delta$ *esxN* mutant hyper-  
320 secreted PPE41, like the  $\Delta$ *pstA1* mutant (Fig. 5B). The ModD and GroEL2 controls demonstrate  
321 equivalent loading of culture filtrate and cell lysate fractions, respectively (Fig. 5B). Overall, our  
322 data suggest that EsxN is not required for production or stability of the ESX-5 components  
323 EccB<sub>5</sub> or EspG<sub>5</sub> and that EsxN and PPE41 are secreted independently.**

324 To investigate if deletion of *esxN* could reverse attenuation of  $\Delta$ *pstA1* mutant, like the  
325  $\Delta$ *BS* mutation, we infected Irgm1<sup>-/-</sup>, NOS2<sup>-/-</sup> and C57BL/6 mice via the aerosol route with ~100  
326 CFU the  $\Delta$ *pstA1 $\Delta$ *esxN* mutant. In contrast to the  $\Delta$ *pstA1 $\Delta$ *BS* mutant that replicated**

327 progressively in the lungs of *Irgm1*<sup>-/-</sup> mice (Fig. 4A), replication of the  $\Delta$ *pstA1* $\Delta$ *esxN* mutant was  
328 well controlled in *Irgm1*<sup>-/-</sup> mice (Fig. 5C). There was no significant difference in CFU recovered  
329 from the lungs of  $\Delta$ *pstA1*- and  $\Delta$ *pstA1* $\Delta$ *esxN*- infected *Irgm1*<sup>-/-</sup> mice at any time point (Fig. 5C).  
330 The  $\Delta$ *pstA1* $\Delta$ *esxN* mutant remained attenuated in *NOS2*<sup>-/-</sup> mice and during the chronic phase of  
331 infection in C57BL/6 mice (Fig. 5D and 5E), similar to the  $\Delta$ *pstA1* $\Delta$ *BS* mutant. Bacterial burdens  
332 in the lungs were not significantly different in either *NOS2*<sup>-/-</sup> mice or C57BL/6 mice infected with  
333 the  $\Delta$ *pstA1* mutant or the  $\Delta$ *pstA1* $\Delta$ *esxN* mutant at any time point (Figs. 5D and 5E). These data  
334 suggest that ESX-5 secreted factors other than EsxN contribute to the attenuation of the  $\Delta$ *pstA1*  
335 mutant in *Irgm1*<sup>-/-</sup> mice.

## 336 **DISCUSSION**

337 We previously demonstrated that the virulence-associated ESX-5 secretion system is  
338 regulated at the transcriptional level by the Pst/SenX3-RegX3 system that stimulates ESX-5  
339 secretion in response to P<sub>i</sub> limitation. By precisely defining the RegX3 binding site in the *esx-5*  
340 locus and creating targeted mutations that specifically disrupt RegX3-mediated regulation of  
341 ESX-5 secretion, we show here that regulation of ESX-5 secretion contributes to *M. tuberculosis*  
342 pathogenesis. Our data suggest that the  $\Delta$ *pstA1* mutant is attenuated in *Irgm1*<sup>-/-</sup> mice due to  
343 hyper-secretion of ESX-5 substrates caused by constitutive activation of RegX3. Our data  
344 further suggest that this attenuation is caused by ESX-5 substrates other than EsxN. Our results  
345 are consistent with a recent report demonstrating that secretion of the PE\_PGRS subfamily of  
346 PE proteins, which are likely ESX-5 substrates, is associated with reduced *M. tuberculosis*  
347 virulence in Balb/c mice (20, 41). We conclude that *M. tuberculosis* requires precise regulation  
348 of ESX-5 secretion during infection for pathogenesis and that ESX-5 substrates other than EsxN  
349 play a direct role in the interaction with the host.

350 While our previous work demonstrated that RegX3 directly controls ESX-5 secretion at the  
351 transcriptional level and defined a region 5' of the *pe19* gene to which RegX3 binds (14), the  
352 precise binding site remained unknown. Here we identified a RegX3 binding site sequence at -

353 128 to -102 bp relative to the *pe19* start codon that consists of three imperfect direct repeats.  
354 We further demonstrated that the two 3' direct repeats and 5 bp spacer with the sequence 5'-  
355 GGTGCcaactGGTGA-3' are necessary for RegX3 binding *in vitro* and transcriptional regulation  
356 of *esx-5* genes *in vivo*. In this respect, RegX3 acts similarly to the *Escherichia coli* PhoB  
357 response regulator that also responds to P<sub>i</sub> limitation by binding to direct repeat sequences (*pho*  
358 boxes) in the promoters of regulated genes (42). The RegX3 binding site sequence in the *esx-5*  
359 locus is upstream of a transcriptional start site that was mapped at -38 relative to the *pe19* start  
360 codon (43), consistent with RegX3 acting as a transcriptional activator of *esx-5* genes. By  
361 creating mutations in or deleting this RegX3 binding site sequence on the *M. tuberculosis*  
362 chromosome, we demonstrate that regulation of ESX-5 secretion by RegX3 in response to P<sub>i</sub>  
363 availability requires this sequence.

364 Attenuation of the  $\Delta$ *pstA1* mutant specifically in *Irgm1*<sup>-/-</sup> mice was almost completely  
365 suppressed by deletion of the RegX3 binding site in the *esx-5* locus, suggesting that the  $\Delta$ *pstA1*  
366 mutant is attenuated in these mice due to constitutive ESX-5 secretion. These data also suggest  
367 that the  $\Delta$ *pstA1* mutant is sensitive to some host factor other than *Irgm1* due to constitutive  
368 ESX-5 secretion. *Irgm1* and NOS2 act independently to control *M. tuberculosis* replication (29),  
369 so it is possible that constitutive ESX-5 secretion causes increased susceptibility of the  $\Delta$ *pstA1*  
370 mutant to NOS2-generated nitrosative stress. Alternatively, the  $\Delta$ *pstA1* mutant may fail to  
371 induce the generalized leukopenia that is typically observed in infected *Irgm1*<sup>-/-</sup> mice (32),  
372 leading to improved control of the infection. In *Irgm1*<sup>-/-</sup> mice, IFN- $\gamma$  produced in response to  
373 infection causes the lymphatic collapse by stimulating autophagic death of effector T cells (31).  
374 Effector T cells may more efficiently recognize and control replication of the  $\Delta$ *pstA1* mutant due  
375 to its constitutive secretion of antigenic ESX-5 substrates, so that T cell containment of infection  
376 occurs despite reduced T cell abundance. The  $\Delta$ *pstA1* mutant could also interfere with IFN- $\gamma$   
377 production or signaling due to constitutive ESX-5 secretion. Manipulation of cytokine responses  
378 is a plausible explanation considering that ESX-5 has previously been implicated in activating



379 the inflammasome and triggering IL-1 $\beta$  production by infected cells (18, 19). Finally, the  
380 susceptibility of *Irgm1*<sup>-/-</sup> mice to infection with intracellular pathogens can be reversed by  
381 deletion of a second IFN- $\gamma$  regulated GTPase *Irgm3* (44). In *Irgm1*<sup>-/-</sup> cells, mislocalization of  
382 effector immunity-related GTPases (IRGs) causes damage to lysosomes, but in cells lacking  
383 *Irgm1* and *Irgm3* the effector IRGs localize to lipid droplets and damage to lysosomes is  
384 prevented (45). It is possible that an ESX-5 secreted protein or proteins interferes with the  
385 function of either *Irgm3* or the effector GTPases to prevent lysosomal damage and enable  
386 *Irgm1*<sup>-/-</sup> mice to contain replication of the  $\Delta$ *pstA1* mutant. We intend to explore these ideas in our  
387 future studies.

388 While constitutive ESX-5 secretion attenuates the  $\Delta$ *pstA1* mutant in *Irgm1*<sup>-/-</sup> mice, the  
389 ESX-5 substrates responsible for this phenotype remain to be determined. Our data suggest  
390 that attenuation is not caused by hyper-secretion of EsxN since the  $\Delta$ *pstA1* $\Delta$ *esxN* mutant  
391 remained attenuated in *Irgm1*<sup>-/-</sup> mice. It is possible that one or more of the EsxN paralogs (*EsxI*,  
392 *EsxL*, *EsxO*, or *EsxV*) plays some role in this process. We could still detect secretion of one or  
393 more of these proteins from the  $\Delta$ *pstA1* $\Delta$ *esxN* mutant using our EsxN anti-serum. However,  
394 secretion of all EsxN paralogs was undetectable in the  $\Delta$ *pstA1* $\Delta$ *BS* mutant, suggesting that  
395 decreased production of ESX-5 core components reduces secretion of all EsxN paralogs. Our  
396 future plans include deleting genes encoding each of the EsxN paralogs individually and in  
397 combination to determine whether these proteins collectively influence pathogenesis.

398 Alternatively, PE and/or PPE proteins secreted via ESX-5 may play a role in attenuation of the  
399  $\Delta$ *pstA1* mutant. PE and PPE proteins are strongly immunogenic in mice in a manner dependent  
400 on secretion via ESX-5 (21). In addition, some PE and PPE proteins can directly manipulate the  
401 functions of host cells (46-48) and, as discussed above, secretion of the PE\_PGRS subfamily in  
402 particular has previously been associated with reduced virulence (41). We are currently working  
403 to define the *M. tuberculosis* ESX-5 secretome using strains we developed that conditionally  
404 express the ESX-5 core component EccD<sub>5</sub> (33) and will explore the potential of these secreted

405 substrates to influence pathogenesis.

406         Although our data indicate that ESX-5 hyper-secretion causes attenuation of the  $\Delta pstA1$  in  
407 *Irgm1*<sup>-/-</sup> mice, aberrant ESX-5 secretion does not contribute substantially to the chronic phase  
408 persistence defect of the  $\Delta pstA1$  mutant in C57BL/6 mice. We recently described that the  
409  $\Delta pstA1$  mutant also exhibits increased release of membrane vesicles (MV) derived from the  
410 inner membrane that contain immune-modulatory lipoproteins and lipoglycans (33, 49).  
411 Importantly, increased MV release by the  $\Delta pstA1$  mutant was independent of ESX-5 secretion  
412 system activity (33). We speculate that aberrant MV production could also contribute to  
413 attenuation of the  $\Delta pstA1$  mutant. The MV-associated lipoprotein LpqH (also known as the  
414 19kDa lipoprotein) is a potent TLR2 ligand and signaling through this pathway causes  
415 pleiotropic effects on the innate immune system that include promoting the production of the  
416 pro-inflammatory cytokines IL-1 $\beta$ , IL-12p40, and TNF $\alpha$  (50), reducing surface MHC class II  
417 expression on macrophages (50-52), and inducing host cell apoptosis and nitric oxide-  
418 independent antimicrobial activity (49, 53, 54). Additionally, LpqH contributes to CD4<sup>+</sup> T cell  
419 activation (55). It is unclear from these studies if increased release of LpqH would be beneficial  
420 or detrimental to bacterial survival and pathogenesis. We are actively exploring the mechanism  
421 of enhanced MV release by the  $\Delta pstA1$  mutant to determine the importance of regulated MV  
422 production in *M. tuberculosis* pathogenesis.

423         While constitutive activation of ESX-5 secretion contributes to attenuation of the  $\Delta pstA1$   
424 mutant, regulation of ESX-5 secretion by RegX3 appears to play only a minor role in *M.*  
425 *tuberculosis* pathogenesis. *regX3* mutants are attenuated during chronic infection of C57BL/6  
426 mice (24, 56), but the  $\Delta BS$  mutant that we constructed, which fails to induce transcription of *esx*-  
427 5 genes or secretion of ESX-5 substrates in response to P<sub>i</sub> limitation *in vitro*, was only modestly  
428 attenuated during the acute phase of infection and persisted normally in the chronic phase of  
429 infection. Our data suggest that other regulatory targets of RegX3 besides ESX-5 influence *M.*  
430 *tuberculosis* persistence and that other regulators may contribute more substantially to

431 controlling ESX-5 activity during infection. Indeed several transcription factors have been  
432 reported to bind within the *esx-5* locus and induce transcription of *esx-5* genes (34, 57). It is  
433 possible that one or more of these regulators plays an important role in controlling ESX-5  
434 secretion during infection, which we plan to investigate in our future studies.

435

## 436 **MATERIALS AND METHODS**

437 **Bacterial strains and culture conditions.** *M. tuberculosis* Erdman and the derivative  $\Delta$ *pstA1*,  
438  $\Delta$ *regX3*, and  $\Delta$ *pstA1 $\Delta$ *regX3* mutant strains were previously described (24). Construction of  
439 strains harboring mutations in the *esx-5* RegX3 binding site sequence is described below.  
440 Bacterial cultures were grown at 37°C with aeration in Middlebrook 7H9 liquid medium (Difco)  
441 supplemented with albumin-dextrose-saline (ADS), 0.5% glycerol and 0.1% Tween-80 or on  
442 Middlebrook 7H10 agar medium (Difco) supplemented with 10% Middlebrook oleic acid-  
443 albumin-dextrose-catalase (OADC, BD Biosciences) and 0.5% glycerol, unless otherwise noted.  
444 Sauton's medium (3.67 mM  $\text{KH}_2\text{PO}_4$ , 2 mM  $\text{MgSO}_4 \cdot 7\text{H}_2\text{O}$ , 9.5 mM citric acid, 0.19 mM  
445 ammonium iron (III) citrate, 26.64 mM L-asparagine, 6% glycerol, 0.01%  $\text{ZnSO}_4$ , pH 7.4) or  $\text{P}_i$ -  
446 limited Sauton's medium (Sauton's containing 2.5  $\mu\text{M}$   $\text{KH}_2\text{PO}_4$ , buffered with 50 mM MOPS, pH  
447 7.4) were used to grow cultures for protein isolation.  $\text{P}_i$ -free 7H9 medium was prepared as  
448 previously described (24). Frozen stocks were prepared by growing liquid cultures to mid-  
449 exponential phase ( $\text{OD}_{600}$  0.8-1.0) in complete 7H9 medium, then adding glycerol to 15% final  
450 concentration, and storing 1 ml aliquots at -80°C.*

451 **Cloning.** Constructs for deleting *esxN* or introducing mutations in the *esx-5* locus RegX3  
452 binding site were generated in the pJG1100 allelic exchange vector, which contains the *aph*  
453 (kanamycin resistance), *hyg* (hygromycin resistance), and *sacB* (sucrose sensitivity) markers  
454 (58). Genomic regions ~800 bp 5' and 3' of the sequence to be mutated were PCR amplified  
455 from the *M. tuberculosis* Erdman genome using the primers in Table S2. Forward primers to  
456 amplify the 5' region were designed with a *PacI* restriction site; reverse primers to amplify the 3'

457 region were designed with an *Ascl* restriction site. For deletion of *esxN*, the reverse primer to  
458 amplify the 5' regions and the forward primer to amplify the 3' region were designed with *AvrII*  
459 restriction sites in-frame with the start and stop codons, respectively. Resulting PCR products  
460 were cloned in pCR2.1 (Invitrogen) and sequenced. The 5' and 3' regions were removed from  
461 pCR2.1 by restriction with *PacI*/*AvrII* and *AvrII*/*Ascl*, respectively, and ligated with pJG1100  
462 digested with *PacI*/*Ascl* to generate the in-frame  $\Delta$ *esxN* deletion construct. For the *esx-5* RegX3  
463 binding site mutations, the forward and reverse primers for amplifying the 3' and 5' regions of  
464 homology, respectively, contained the mutation to be introduced and were designed with  
465 overlapping sequence at the 5' ends to allow PCR products to be joined by overlap extension  
466 PCR (59) before cloning in pCR2.1. Sequence-confirmed binding site mutation constructs were  
467 removed from pCR2.1 by restriction with *PacI*/*Ascl* and ligated to similarly digested pJG1100.  
468 **Strain construction.** *M. tuberculosis* strains harboring the  $\Delta$ *esxN* deletion or *esx-5* RegX3  
469 binding site mutations were generated by two-step allelic exchange, as previously described  
470 (24). Integration of the pJG1100 construct at the correct location was confirmed by colony PCR  
471 on heat-inactivated cell lysates using the primer pairs for detection of the 5' and 3' homologous  
472 recombination (Tables S2 & S3). Clones with the plasmid integrated were grown without  
473 antibiotics, diluted and plated on 7H10 containing 2% sucrose for counter-selection of the  
474 pJG1100 vector. Sucrose resistant isolates were screened by colony PCR on heat-inactivated  
475 cell lysates using primers for the detection of the deletion or mutation (Tables S2 & S3). The  
476 *esx-5* RegX3 binding site mutations were verified by Sanger sequencing of the resulting PCR  
477 products.

478 **Purification of His<sub>6</sub>-RegX3.** Recombinant His<sub>6</sub>-RegX3 was expressed and purified from  
479 *Escherichia coli* BL21 (DE3) containing pET28b+::regX3 by affinity chromatography using Ni-  
480 NTA agarose (Qiagen) as previously described (14).

481 **Electrophoretic mobility shift assays.** Double-stranded DNA probes were PCR amplified  
482 using *M. tuberculosis* Erdman genomic DNA as template and appropriate primers (Table S4).

483 Probes were labeled with the DIG Gel Shift Kit, 2<sup>nd</sup> Generation (Roche), following the  
484 manufacturer's protocols. Binding reactions with 0.5 ng of DIG-labeled probe, binding buffer  
485 (Roche), poly[d(I-C)], poly L-lysine, and 0.5 µg purified His<sub>6</sub>-RegX3 in 20 µl total volume were  
486 incubated at room temperature for 15 min. Binding reactions including a 400-fold excess of  
487 unlabeled competitor (200 ng) were incubated for 15 min at room temperature prior to adding  
488 the DIG-labeled probe, then incubated an additional 15 min. DNA-protein complexes were  
489 resolved by electrophoresis on 5% native polyacrylamide gels, transferred and UV-crosslinked  
490 to nylon membranes (Roche). Membranes were washed with wash buffer (DIG wash and block  
491 buffer set, Roche), blocked for 30 min in blocking solution (Roche) and incubated with anti-DIG-  
492 AP antibodies (Roche) at a 1:10,000 dilution for 30 min at room temperature. Labeled probes  
493 were detected using CDP-Star ready-to-use substrate (Roche). Membranes were exposed to  
494 film (Blue lite autorad film, Genemate) and developed using a film processor (Konica, SRX-  
495 101A).

496 **Quantitative RT-PCR.** To measure gene expression in P<sub>i</sub>-rich conditions, bacteria were grown  
497 in complete Middlebrook 7H9 medium to mid-exponential phase (OD<sub>600</sub> 0.4-0.6). To test  
498 induction of gene expression during P<sub>i</sub> starvation, cultures were grown in 7H9 to mid-exponential  
499 phase (OD<sub>600</sub> 0.4-0.6), washed twice and resuspended at OD<sub>600</sub> 0.2 in P<sub>i</sub>-free 7H9, and then  
500 grown at 37°C with aeration for 24 hr. Bacteria were collected by centrifugation (3700 x g, 10  
501 min, 4°C). Total RNA was extracted using TRIzol (Invitrogen, CA) with 0.1% polyacryl carrier  
502 (Molecular Research Center, Inc) by bead beating with 0.1 mm zirconia beads (BioSpec  
503 Products). Equivalent amounts of total RNA were treated with Turbo DNase (Invitrogen) and  
504 converted to cDNA using the Transcriptor First Strand cDNA Synthesis Kit (Roche) with random  
505 hexamer primers and the following parameters: 10 min at 25°C (annealing of primers), 60 min at  
506 50°C (elongation), and 5 min at 85°C (heat inactivation of reverse transcriptase). cDNA was  
507 stored at -20°C.

508 Quantitative PCR primers to amplify internal regions of the genes of interest (*pe19*,  
509 *esxN*, *espG<sub>5</sub>*, *eccD<sub>5</sub>*, *udgA*, *mgtA*, and *sigA*) were designed with similar annealing temperatures  
510 (58-60°C) using either Primer Express software (Applied Biosystems) or ProbeFinder Assay  
511 Design software (Roche) and are listed in Table S5. Quantitative RT-PCR reactions were  
512 prepared using 2x SYBR Green master mix (Roche), 2.5 µM each primer and 1 µl cDNA and  
513 run on a LightCycler 480 (Roche) using the following cycle parameters: 95°C for 10 min; 45  
514 cycles of 95°C for 10s, 60°C for 20s, and 72°C for 20s with data collected once per cycle during  
515 the extension phase; and one cycle of 95°C for 5s, 65°C for 1m, 97°C with a ramp rate of 0.11  
516 °C/s for generation of melting curves. Cycle threshold values ( $C_p$ , Roche nomenclature) were  
517 converted to copy numbers using standard curves for each gene generated using genomic  
518 DNA. Gene copy numbers were normalized to *sigA*.

519 **Antisera production.** Rabbit polyclonal antisera against *EccD<sub>5</sub>*, *EsxN* and PPE41 were  
520 previously described (33, 60). Synthetic antigenic peptides (*EccB<sub>5</sub>* 489-506,  
521 EHDTLPMDMTPAELVVPK; *EspG<sub>5</sub>* 283-300, KTVLDTLPYGEWKTHSRV) that were identified  
522 with Antigen Profiler and conjugated to keyhole limpet hemocyanin (KLH) were used with  
523 TiterMax Gold adjuvant (Sigma) to raise polyclonal antisera against *EccB<sub>5</sub>* and *EspG<sub>5</sub>* in rabbits  
524 (Pierce Custom Antibodies, Thermo Scientific).

525 **Protein preparation for immunoblots.** *M. tuberculosis* cultures were grown at 37°C with  
526 aeration in Sauton's medium or  $P_i$ -limited (2.5 µM  $P_i$ ) Sauton's medium for five days as  
527 previously described (14) prior to protein isolation. Bacteria were collected by centrifugation  
528 (4700 x  $g$ , 15 min, 4°C). Culture supernatants were filter sterilized as previously described (14)  
529 and Complete EDTA-free protease inhibitor tablets (Roche) were added. Supernatants were  
530 concentrated roughly 25-fold by centrifugation (2400 x  $g$ , 4°C) using VivaSpin 5 kDa molecular  
531 weight cut-off spin columns (Sartorius). Whole cell lysates were prepared by bead beating with  
532 0.1 mm zirconia beads (BioSpec Products) in PBS containing Complete EDTA-free protease  
533 inhibitors (Roche) and lysates were clarified by centrifugation as previously described (14). Cell

534 lysates were passaged through a Nanosep MF column with a 0.22  $\mu\text{m}$  filter (Pall Life Sciences)  
535 by centrifugation (14000 x  $g$ , 3 min, 4°C) to remove any remaining intact cells. Total protein  
536 concentration in each sample was quantified using the Pierce BCA Protein Concentration Assay  
537 kit (Thermo Scientific). Proteins were stored at 4°C for immediate use, or at -80°C with glycerol  
538 at 15% final concentration.

539 **Western blotting.** Culture filtrate or whole cell lysate proteins were separated by sodium  
540 dodecyl sulfate polyacrylamide gel electrophoresis (SDS-PAGE) on Mini-PROTEAN TGX Any  
541 kD gels (Bio-Rad) and transferred to nitrocellulose membranes (Whatman) by electrophoresis.  
542 Proteins were detected by Western blotting as previously described (14) using primary anti-sera  
543 at the following dilutions: rabbit  $\alpha$ -EsxN 1:1000; rabbit  $\alpha$ -EspG<sub>5</sub> 1:1000; rabbit  $\alpha$ -EccB<sub>5</sub> 1:1000;  
544 rabbit  $\alpha$ -EccD<sub>5</sub> 1:1000; rabbit  $\alpha$ -PPE41 1:1000; rabbit  $\alpha$ -ModD 1:25000; mouse  $\alpha$ -GroEL2  
545 1:1,000. Appropriate secondary antibodies (either goat-anti-rabbit or rabbit-anti-mouse  
546 conjugated to HRP, Sigma) and SuperSignal West Pico substrate (Thermo Scientific) were used  
547 to detect reactive bands. Blots were imaged on an Odyssey Fc Imaging System (LI-Cor) and  
548 protein abundance was analyzed using ImageStudio software (LI-Cor).

549 **Mouse infections.** Female C57BL/6J and NOS2<sup>-/-</sup> mice 6-8 weeks of age were purchased from  
550 Jackson Laboratories. Irgm1<sup>-/-</sup> mice were bred under specific-pathogen-free conditions at the  
551 University of Minnesota Research Animal Resources. Mice were infected with ~100 CFU using  
552 an Inhalation Exposure System (GlasCol) as previously described (36). Infected mice were  
553 euthanized with CO<sub>2</sub> overdose. Bacterial CFU were enumerated by plating serial dilutions of  
554 lung homogenates on complete Middlebrook 7H10 agar containing 100  $\mu\text{g}/\text{ml}$  cyclohexamide  
555 and counting CFU after 3-4 weeks of incubation at 37°C. All animal protocols were reviewed  
556 and approved by University of Minnesota Institutional Animal Care and Use committee and were  
557 conducted in accordance with recommendations in the National Institutes of Health *Guide for*  
558 *the Care and Use of Laboratory Animals* (61).

559 **ACKNOWLEDGEMENTS**



560 We thank Alyssa Brokaw and Leanne Zhang for expert technical assistance with animal  
561 experiments, and the staff of the University of Minnesota BSL-3/ABSL-3 core facility. Antisera  
562 against GroEL2 (monoclonal clone IT-70, cat. no. NR-13657) and ModD (polyclonal anti-Mpt32,  
563 cat. no. NR-13807) were obtained from BEI Resources, NIAID, NIH. This work was supported  
564 by an NIH Director's New Innovator Award, DP2AI112245 (A.D.T.), start-up funding from the  
565 University of Minnesota (A.D.T.), and the Dennis W. Watson Fellowship (D.W.W.).

566

## 567 REFERENCES

- 568 1. Reyes Ruiz VM, Ramirez J, Naseer N, Palacio NM, Siddarthan IJ, Yan BM, Boyer MA,  
569 Pensinger DA, Sauer JD, Shin S. 2017. Broad detection of bacterial type III secretion  
570 system and flagellin proteins by the human NAIP/NLRC4 inflammasome. *Proc Natl Acad*  
571 *Sci USA* 114:13242-13247.
- 572 2. Sturm A, Heinemann M, Arnoldini M, Benecke A, Ackermann M, Benz M, Dormann J,  
573 Hardt W-D. 2011. The cost of virulence: Retarded growth of *Salmonella* Typhimurium  
574 cells expressing Type III secretion system 1. *PLoS Pathog* 7:e1002143.
- 575 3. Gröschel MI, Sayes F, Simeone R, Majlessi L, Brosch R. 2016. ESX secretion systems:  
576 mycobacterial evolution to counter host immunity. *Nat Rev Microbiol* 14:677-691.
- 577 4. Tinaztepe E, Wei J-R, Raynowska J, Portal-Celhay C, Thompson V, Philips JA. 2016.  
578 Role of metal-dependent regulation of ESX-3 secretion in intracellular survival of  
579 *Mycobacterium tuberculosis*. *Infect Immun* 84:2255-2263.
- 580 5. Tufariello JM, Chapman JR, Kerantzas CA, Wong KW, Vilcheze C, Jones CM, Cole LE,  
581 Tinaztepe E, Thompson V, Fenyo D, Niederweis M, Ueberheide B, Philips JA, Jacobs  
582 WR, Jr. 2016. Separable roles for *Mycobacterium tuberculosis* ESX-3 effectors in iron  
583 acquisition and virulence. *Proc Natl Acad Sci USA* 113:E348-357.
- 584 6. Mehra A, Zahra A, Thompson V, Sirisaengtaksin N, Wells A, Porto M, Koster S,  
585 Penberthy K, Kubota Y, Dricot A, Rogan D, Vidal M, Hill DE, Bean AJ, Philips JA. 2013.

- 586 *Mycobacterium tuberculosis* Type VII secreted effector EsxH targets host ESCRT to  
587 impair trafficking. PLoS Pathog 9:e1003734.
- 588 7. van Der Wel N, Hava D, Houben D, Fluitsma D, van Zon M, Pierson J, Brenner M,  
589 Peters PJ. 2007. *M. tuberculosis* and *M. leprae* translocate from the phagolysosome to  
590 the cytosol in myeloid cells. Cell 129:1287-1298.
- 591 8. Wong K-W, Jacobs WR, Jr. 2011. Critical role for NLRP3 in necrotic death triggered by  
592 *Mycobacterium tuberculosis*. Cell Microbiol 13:1371-1384.
- 593 9. Manzanillo PS, Shiloh MU, Portnoy DA, Cox JS. 2012. *Mycobacterium tuberculosis*  
594 activates the DNA-dependent cytosolic surveillance pathway within macrophages. Cell  
595 Host Microbe 11:469-480.
- 596 10. Frigui W, Bottai D, Majlessi L, Monot M, Josselin E, Brodin P, Garnier T, Gicquel B,  
597 Martin C, Leclerc C, Cole ST, Brosch R. 2008. Control of *M. tuberculosis* ESAT-6  
598 secretion and specific T cell recognition by PhoP. PLoS Pathog 4:e33.
- 599 11. Pang X, Samten B, Cao G, Wang X, Tvinnereim AR, Chen X-L, Howard ST. 2013.  
600 MprAB regulates the *espA* operon in *Mycobacterium tuberculosis* and modulates ESX-1  
601 function and host cytokine response. J Bacteriol 195:66-75.
- 602 12. Abramovitch RB, Rohde KH, Hsu F-F, Russell DG. 2011. *aprABC*: a *Mycobacterium*  
603 *tuberculosis* complex-specific locus that modulates pH-driven adaptation to the  
604 macrophage phagosome. Mol Microbiol 80:678-694.
- 605 13. He H, Hovey R, Kane J, Singh V, Zahrt TC. 2006. MprAB is a stress-responsive two-  
606 component system that directly regulates expression of sigma factors SigB and SigE in  
607 *Mycobacterium tuberculosis*. J Bacteriol 188:2134-2143.
- 608 14. Elliott SR, Tischler AD. 2016. Phosphate starvation: a novel signal that triggers ESX-5  
609 secretion in *Mycobacterium tuberculosis*. Mol Microbiol 100:510-526.

- 610 15. Di Luca M, Bottai D, Batoni G, Orgeur M, Aulicino A, Counoupas C, Campa M, Brosch  
611 R, Esin S. 2012. The ESX-5 associated *eccB<sub>5</sub>-eccC<sub>5</sub>* locus is essential for  
612 *Mycobacterium tuberculosis* viability. PLoS One 7:e52059.
- 613 16. Ates LS, Ummels R, Commandeur S, van der Weerd R, Sparrius M, Weerdenburg E,  
614 Alber M, Kalscheuer R, Piersma SR, Abdallah AM, El Ghany MA, Abdel-Haleem AM,  
615 Pain A, Jiménez CR, Bitter W, Houben ENG. 2015. Essential role of the ESX-5 secretion  
616 system in outer membrane permeability of pathogenic mycobacteria. PLoS Genet  
617 11:e1005190.
- 618 17. Bottai D, Di Luca M, Majlessi L, Frigui W, Simeone R, Sayes F, Bitter W, Brennan MJ,  
619 Leclerc C, Batoni G, Campa M, Brosch R, Esin S. 2012. Disruption of the ESX-5 system  
620 of *Mycobacterium tuberculosis* causes loss of PPE protein secretion, reduction of cell  
621 wall integrity and strong attenuation. Mol Microbiol 83:1195-1209.
- 622 18. Abdallah AM, Bestebroer J, Savage NDL, de Punder K, van Zon M, Wilson L, Korbee  
623 CJ, van der Sar AM, Ottenhoff THM, van der Wel NN, Bitter W, Peters PJ. 2011.  
624 Mycobacterial secretion systems ESX-1 and ESX-5 play distinct roles in host cell death  
625 and inflammasome activation. J Immunol 187:4744-4753.
- 626 19. Shah S, Cannon JR, Fenselau C, Briken V. 2015. A duplicated ESAT-6 region of ESX-5  
627 is involved in protein export and virulence of mycobacteria. Infect Immun 83:4349-4361.
- 628 20. Abdallah AM, Verboom T, Weerdenburg EM, Gey van Pittius NC, Mahasha PW,  
629 Jimenez C, Parra M, Cadieux N, Brennan MJ, Appelmeik BJ, Bitter W. 2009. PPE and  
630 PE\_PGRS proteins of *Mycobacterium marinum* are transported via the type VII secretion  
631 system ESX-5. Mol Microbiol 73:329-340.
- 632 21. Sayes F, Sun L, Di Luca M, Simeone R, Degaiffier N, Fiette L, Esin S, Brosch R, Bottai  
633 D, Leclerc C, Majlessi L. 2012. Strong immunogenicity and cross-reactivity of  
634 *Mycobacterium tuberculosis* ESX-5 type VII secretion-encoded PE-PPE proteins  
635 predicts vaccine potential. Cell Host Microbe 11:352-363.

- 636 22. Alderson MR, Bement T, Day CH, Zhu L, Molesh D, Skeiky YA, Coler R, Lewinsohn DM,  
637 Reed SG, Dillon DC. 2000. Expression cloning of an immunodominant family of  
638 *Mycobacterium tuberculosis* antigens using human CD4(+) T cells. J Exp Med 191:551-  
639 560.
- 640 23. Arlehamn CSL, Gerasimova A, Mele F, Henderson R, Swann J, Greenbaum JA, Kim Y,  
641 Sidney J, James EA, Taplitz R, McKinney DM, Kwok WW, Grey H, Sallusto F, Peters B,  
642 Sette A. 2013. Memory T cells in latent *Mycobacterium tuberculosis* infection are  
643 directed against three antigenic islands and are largely contained in a CXCR3<sup>+</sup>CCR6<sup>+</sup>  
644 Th1 subset. PLoS Pathog 9:e1003130.
- 645 24. Tischler AD, Leistikow RL, Kirksey MA, Voskuil MI, McKinney JD. 2013. *Mycobacterium*  
646 *tuberculosis* requires phosphate-responsive gene regulation to resist host immunity.  
647 Infect Immun 81:317-328.
- 648 25. Laubach VE, Shesely EG, Smithies O, Sherman PA. 1995. Mice lacking inducible nitric  
649 oxide synthase are not resistant to lipopolysaccharide-induced death. Proc Natl Acad Sci  
650 USA 92:10688-10692.
- 651 26. MacMicking JD, North RJ, LaCourse R, Mudgett JS, Shah SK, Nathan CF. 1997.  
652 Identification of nitric oxide synthase as a protective locus against tuberculosis. Proc Natl  
653 Acad Sci USA 94:5243-5248.
- 654 27. Mishra BB, Rathinam VAK, Martens GW, Martinot AJ, Kornfeld H, Fitzgerald KA,  
655 Sasseti CM. 2012. Nitric oxide controls the immunopathology of tuberculosis by  
656 inhibiting the NLRP3 inflammasome-dependent processing of IL-1 $\beta$ . Nat Immunol online.
- 657 28. Mishra BB, Lovewell RR, Olive AJ, Zhang G, Wang W, Eugenin E, Smith CM, Phuah JY,  
658 Long JE, Dubuke ML, Palace SG, Goguen JD, Baker RE, Nambi S, Mishra R, Booty  
659 MG, Baer CE, Shaffer SA, Dartois V, McCormick BA, Chen X, Sasseti CM. 2017. Nitric  
660 oxide prevents a pathogen-permissive granulocytic inflammation during tuberculosis. Nat  
661 Microbiol 2:17072.

- 662 29. MacMicking JD, Taylor GA, McKinney JD. 2003. Immune control of tuberculosis by IFN-  
663  $\gamma$ -inducible LRG-47. *Science* 302:654-659.
- 664 30. Gutierrez MG, Master SS, Singh SB, Taylor GA, Colombo MI, Deretic V. 2004.  
665 Autophagy is a defense mechanism inhibiting BCG and *Mycobacterium tuberculosis*  
666 survival in infected macrophages. *Cell* 119:753-766.
- 667 31. Feng CG, Zheng L, Jankovic D, Bafica A, Cannons JL, Watford WT, Chaussabel D,  
668 Hieny S, Caspar P, Schwartzberg PL, Lenardo MJ, Sher A. 2008. The immunity-related  
669 GTPase Irgm1 promotes the expansion of activated CD4+ T cell populations by  
670 preventing interferon-g-induced cell death. *Nat Immunol* 9:1279-1287.
- 671 32. Feng CG, Collazo-Custodio CM, Eckhaus M, Hieny S, Belkaid Y, Elkins K, Jankovic D,  
672 Taylor GA. 2004. Mice deficient in LRG-47 display increased susceptibility to  
673 mycobacterial infection associated with the induction of lymphopenia. *J Immunol*  
674 172:1163-1168.
- 675 33. White DW, Elliott SR, Odean E, Bemis LT, Tischler AD. 2018. *Mycobacterium*  
676 *tuberculosis* Pst/SenX3-RegX3 regulates membrane vesicle production independently of  
677 ESX-5 activity. *mBio* 9:e00778-00718.
- 678 34. Minch KJ, Rustad TR, Peterson EJ, Winkler J, Reiss DJ, Ma S, Hickey M, Brabant W,  
679 Morrison B, Turkarslan S, Mawhinney C, Galagan JE, Price ND, Baliga NS, Sherman  
680 DR. 2015. The DNA-binding network of *Mycobacterium tuberculosis*. *Nat Commun*  
681 6:5829.
- 682 35. Martinez-Hackert E, Stock AM. 1997. Structural relationships in the OmpR family of  
683 winged-helix transcription factors. *J Mol Biol* 269:301-312.
- 684 36. Ramakrishnan P, Aagesen AM, McKinney JD, Tischler AD. 2016. *Mycobacterium*  
685 *tuberculosis* resists stress by regulating PE19 expression. *Infect Immun* 84:735-746.

- 686 37. Uplekar S, Heym B, Friocourt V, Rougemont J, Cole ST. 2011. Comparative genomics  
687 of *esx* genes from clinical isolates of *Mycobacterium tuberculosis* provides evidence for  
688 gene conversion and epitope variation. *Infect Immun* 79:4042-4049.
- 689 38. Fortune SM, Jaeger A, Sarracino DA, Chase MR, Sasseti CM, Sherman DR, Bloom BR,  
690 Rubin EJ. 2005. Mutually dependent secretion of proteins required for mycobacterial  
691 virulence. *Proc Natl Acad Sci USA* 102:10676-10681.
- 692 39. Millington KA, Fortune SM, Low J, Garces A, Hingley-Wilson SM, Wickremasinghe M,  
693 Kon OM, Lalvani A. 2011. Rv3615c is a highly immunodominant RD1 (Region of  
694 Difference 1)-dependent secreted antigen specific for *Mycobacterium tuberculosis*  
695 infection. *Proc Natl Acad Sci USA* 108:5730-5735.
- 696 40. Chen JM, Boy-Röttger S, Dhar N, Sweeney N, Buxton RS, Pojer F, Rosenkrands I, Cole  
697 ST. 2012. EspD is critical for the virulence-mediating ESX-1 secretion system in  
698 *Mycobacterium tuberculosis*. *J Bacteriol* 194:884-893.
- 699 41. Ates LS, Dippenaar A, Ummels R, Piersma SR, van der Woude AD, van der Kuij K, Le  
700 Chevalier F, Mata-Espinosa D, Barrios-Payan J, Marquina-Castillo B, Guapillo C,  
701 Jimenez CR, Pain A, Houben ENG, Warren RM, Brosch R, Hernandez-Pando R, Bitter  
702 W. 2018. Mutations in *ppe38* block PE\_PGRS secretion and increase virulence of  
703 *Mycobacterium tuberculosis*. *Nat Microbiol* 3:181-188.
- 704 42. Blanco AG, Sola M, Gomis-Ruth FX, Coll M. 2002. Tandem DNA recognition by PhoB, a  
705 two-component signal transduction transcriptional activator. *Structure* 10:701-713.
- 706 43. Shell SS, Wang J, Lapierre P, Mir M, Chase MR, Pyle MM, Gawande R, Ahmad R,  
707 Sarracino DA, Ioerger TR, Fortune SM, Derbyshire KM, Wade JT, Gray TA. 2015.  
708 Leaderless transcripts and small proteins are common features of the mycobacterial  
709 translational landscape. *PLoS Genet* 4:e1005641.

- 710 44. Henry SC, Daniell XG, Burroughs AR, Indaram M, Howell DN, Coers J, Starnbach MN,  
711 Hunn JP, Howard JC, Feng CG, Sher A, Taylor GA. 2009. Balance of Irgm protein  
712 activities determines IFN- $\gamma$ -induced host defense. *J Leukoc Biol* 85.
- 713 45. Maric-Biresev J, Hunn JP, Krut O, Helms JB, Martens S, Howard JC. 2016. Loss of the  
714 interferon- $\gamma$ -inducible regulatory immunity-related GTPase (IRG), Irgm1, causes  
715 activation of effector IRG proteins on lysosomes, damaging lysosomal function and  
716 predicting the dramatic susceptibility of Irgm1-deficient mice to infection. *BMC Biol*  
717 14:33.
- 718 46. Fishbein S, van Wyk N, Warren RM, Sampson SL. 2015. Phylogeny to function: PE/PPE  
719 protein evolution and impact on *Mycobacterium tuberculosis* pathogenicity. *Mol Microbiol*  
720 96:901-916.
- 721 47. Thi EP, Hong CJH, Sanghera G, Reiner NE. 2013. Identification of the *Mycobacterium*  
722 *tuberculosis* protein PE-PGRS62 as a novel effector that functions to block phagosome  
723 maturation and inhibit iNOS expression. *Cell Microbiol* 15:795-808.
- 724 48. Saini NK, Baena A, Ng TW, Venkataswamy MM, Kennedy SC, Kunnath-Velayudhan S,  
725 Carreño LJ, Xu J, Chan J, Larsen MH, Jacobs WR, Jr., Porcelli SA. 2016. Suppression  
726 of autophagy and antigen presentation by *Mycobacterium tuberculosis* PE\_PGRS47.  
727 *Nat Microbiol* 1:16133.
- 728 49. Prados-Rosales R, Baena A, Martinez LR, Luque-Garcia J, Kalscheuer R,  
729 Veeraraghavan U, Camara C, Nosanchuk JD, Besra GS, Chen B, Jimenez J, Glatman-  
730 Freedman A, Jacobs WR, Jr., Porcelli SA, Casadevall A. 2011. Mycobacteria release  
731 active membrane vesicles that modulate immune responses in a TLR2-dependent  
732 manner in mice. *J Clin Invest* 121:1471-1483.
- 733 50. Stewart G, Wilkinson KA, Newton SM, Sullivan SM, Neyrolles O, Wain JR, Patel J, Pool  
734 K-L, Young DB, Wilkinson RJ. 2005. Effect of deletion of overexpression of the 19-



- 735 kilodalton lipoprotein Rv3763 on the innate response to *Mycobacterium tuberculosis*.  
736 Infect Immun 73:6831-6837.
- 737 51. Noss EH, Pai RK, Sellati TJ, Radolf JD, Belisle J, Golenbock DT, Boom WH, Harding  
738 CV. 2001. Toll-like receptor 2-dependent inhibition of macrophage class II MHC  
739 expression and antigen processing by 19-kDa lipoprotein of *Mycobacterium tuberculosis*.  
740 J Immunol 167:910-918.
- 741 52. Pai RK, Convery M, Hamilton TA, Boom WH, Harding CV. 2003. Inhibition of IFN- $\gamma$ -  
742 induced class II transactivator expression by a 19-kDa lipoprotein from *Mycobacterium*  
743 *tuberculosis*: a potential mechanism for immune evasion. J Immunol 171:175-184.
- 744 53. Lopez M, Sly LM, Luu Y, Young D, Cooper H, Reiner NE. 2003. The 19-kDa  
745 *Mycobacterium tuberculosis* protein induces macrophage apoptosis through Toll-like  
746 receptor-2. J Immunol 170:2409-2416.
- 747 54. Thoma-Uszynski S, Stenger S, Takeuchi O, Ochoa MT, Engele M, Sieling PA, Barnes  
748 PF, Rölinghoff M, Bölcskei PL, Wagner M, Akira S, Norgard MV, Belisle JT, Godowski  
749 PJ, Bloom BR, Modlin RL. 2001. Induction of direct antimicrobial activity through  
750 mammalian Toll-like receptors. Science 291:1544-1547.
- 751 55. Lancioni CL, Li Q, Thomas JJ, Ding X, Thiel B, Drage MG, Pecora ND, Ziady AG, Shank  
752 S, Harding CV, Boom WH, Rojas RE. 2011. *Mycobacterium tuberculosis* lipoproteins  
753 directly regulate human memory CD4<sup>+</sup> T cell activation via Toll-like receptors 1 and 2.  
754 Infect Immun 79:663-673.
- 755 56. Rifat D, Belchis DA, Karakousis PC. 2014. *senX3*-independent contribution of *regX3* to  
756 *Mycobacterium tuberculosis* virulence. BMC Microbiol 14:265.
- 757 57. Rustad TR, Minch KJ, Ma S, Winkler JK, Hobbs S, Hickey M, Brabant W, Turkarslan S,  
758 Price ND, Baliga NS, Sherman DR. 2014. Mapping and manipulating the *Mycobacterium*  
759 *tuberculosis* transcriptome using a transcription factor overexpression-derived regulatory  
760 network. Genome Biol 15:502.

- 761 58. Kirksey MA, Tischler AD, Siméone R, Hisert KB, Uplekar S, Guilhot C, McKinney JD.  
762 2011. Spontaneous phthiocerol dimycocerosate-deficient variants of *Mycobacterium*  
763 *tuberculosis* are susceptible to gamma interferon-mediated immunity. *Infect Immun*  
764 79:2829-2838.
- 765 59. Senanayake SD, Brian DA. 1995. Precise large deletions by the PCR-based overlap  
766 extension method. *Mol Biotechnol* 4:13-15.
- 767 60. Barczak AK, Avraham R, Singh S, Luo SS, Zhang WR, Bray MA, Hinman AE,  
768 Thompson M, Nietupski RM, Golas A, Montgomery P, Fitzgerald M, Smith RS, White  
769 DW, Tischler AD, Carpenter AE, Hung DT. 2017. Systematic, multiparametric analysis of  
770 *Mycobacterium tuberculosis* intracellular infection offers insight into coordinated  
771 virulence. *PLoS Pathog* 13:e1006363.
- 772 61. National Research Council. 2011. Guide for the care and use of laboratory animals, 8th  
773 ed. National Academies Press, Washington, DC.

774

## 775 **FIGURE LEGENDS**

### 776 **Figure 1. Competitive EMSAs define a RegX3 binding site 5' of *pe19* in the *esx-5* locus.**

777 (A) Schematic depicting the location of EMSA probes and competitors in the *esx-5* locus.

778 Positions of the 5' and 3' ends of probe and competitor sequences relative to the *pe19*

779 translational start site are indicated. (C) Sequences of the 5' Probe, truncated competitors that

780 defined the 5' and 3' ends of the RegX3 binding site, and mutated competitors that defined

781 sequence elements required for RegX3 binding. Direct repeats (red text) and the 5' and 3' ends

782 of each competitor relative to the *pe19* translational start site are indicated. Mutated sequences

783 are highlighted by underlines and green (DR3), purple (DR1), blue (DR2) or gray (spacer) text.

784 (B, D, and E) EMSA analysis of binding between purified His<sub>6</sub>-RegX3 (0.5 µg), DIG-labeled

785 probe (0.5 ng), and unlabeled competitors (200 ng), as indicated. Results are representative of

786 two independent experiments.

787 **Figure 2. Mutation of the *esx-5* RegX3 binding site suppresses over-expression of *esx-5***  
788 **genes and hyper-secretion of EsxN by the  $\Delta$ *pstA1* mutant.** (A) Transcript abundance of  
789 *pe19*, *espG<sub>5</sub>* and *eccD<sub>5</sub>* relative to *sigA* were determined by quantitative RT-PCR for the  
790 indicated strains grown to mid-logarithmic phase in 7H9 complete medium. Results are the  
791 means  $\pm$  standard deviations of three independent experiments. \*\* $P < 0.01$ , \*\*\*\* $P < 0.0001$ . (B)  
792 The indicated strains were grown in Sauton's medium without Tween-80. Cell lysates (10  $\mu$ g)  
793 and culture filtrates (5  $\mu$ g) were separated and analyzed by Western blotting to detect the  
794 indicated proteins. Results shown are from a single experiment and are representative of two  
795 independent experiments.

796 **Figure 3. Deletion of the *esx-5* RegX3 binding site prevents activation of ESX-5 secretion**  
797 **in response to P<sub>i</sub> limitation.** (A & B) Transcript abundance of *pe19*, *espG<sub>5</sub>* and *eccD<sub>5</sub>* relative  
798 to *sigA* were determined by quantitative RT-PCR for the indicated strains grown to mid-  
799 logarithmic phase in P<sub>i</sub>-free 7H9 medium (A) or P<sub>i</sub>-replete 7H9 complete medium (B). Results  
800 are the means  $\pm$  standard deviations of three independent experiments. \* $P < 0.05$ , \*\* $P < 0.01$ ,  
801 \*\*\* $P < 0.0001$ , \*\*\*\* $P < 0.0001$ . (C) The indicated strains were grown in Sauton's medium without  
802 Tween-80 (WT +P<sub>i</sub>) or in P<sub>i</sub>-limiting (2.5  $\mu$ M P<sub>i</sub>) Sauton's medium without Tween-80. Cell lysates  
803 (10  $\mu$ g) and culture filtrates (5  $\mu$ g) were separated and analyzed by Western blotting to detect  
804 the indicated proteins. Results shown are from a single experiment and are representative of  
805 two independent experiments.

806 **Figure 4. Deletion of the *esx-5* RegX3 binding site in the  $\Delta$ *pstA1* mutant restores**  
807 **virulence in *Irgm1*<sup>-/-</sup> mice.** *Irgm1*<sup>-/-</sup> (A), *NOS2*<sup>-/-</sup> (B) or C57BL/6J (C) mice were infected by the  
808 aerosol route with ~100 CFU of the *M. tuberculosis* WT,  $\Delta$ *pstA1*,  $\Delta$ *BS*, or  $\Delta$ *pstA1* $\Delta$ *BS* strain.  
809 Groups of mice ( $n=4$ ) were sacrificed at the indicated time points and bacterial CFU were  
810 enumerated by plating serial dilutions of lung homogenates. Results are the means  $\pm$  standard  
811 errors of the means. Results for the  $\Delta$ *pstA1* $\Delta$ *BS* mutant in *Irgm1*<sup>-/-</sup> mice are from one  
812 representative experiment of two independent experiments. All other results are from a single

813 experiment. Data for the WT control in panel B are reproduced from (24) for comparison with  
814 the  $\Delta BS$  mutant. Asterisks indicate statistically significant differences between WT and  $\Delta BS$   
815 (black) or between  $\Delta pstA1$  and  $\Delta pstA1\Delta BS$  (red). \*\* $P < 0.01$ , \*\*\* $P < 0.001$ , \*\*\*\* $P < 0.0001$ ,  
816  $\ddagger P = 0.1353$ .

817 **Figure 5. Hyper-secretion of EsxN does not cause attenuation of the  $\Delta pstA1$  mutant.** (A)

818 Abundance of the *esxN* and *espG<sub>5</sub>* transcripts relative to *sigA* was determined by quantitative  
819 RT-PCR for the indicated strains grown to mid-logarithmic phase in 7H9 complete medium.

820 Results are the means  $\pm$  standard deviations of three independent experiments. Colored #

821 indicates the transcript was not detected in the corresponding mutant. (B) The indicated strains

822 were grown in Sauton's medium without Tween-80. Cell lysates (10  $\mu$ g) and culture filtrates (5

823  $\mu$ g) were separated and analyzed by Western blotting to detect the indicated proteins. Results

824 shown are from a single experiment and are representative of two independent experiments. (C-

825 E) Aerosol infection of mice. *Irgm1*<sup>-/-</sup> (C), *NOS2*<sup>-/-</sup> (D) or C57BL/6J (E) mice were infected with

826  $\sim 100$  CFU of the *M. tuberculosis* WT,  $\Delta pstA1$ , or  $\Delta pstA1\Delta esxN$  strain. Groups of mice ( $n=4$ )

827 were sacrificed at the indicated time points and bacterial CFU were enumerated by plating serial

828 dilutions of lung homogenates. Results are the means  $\pm$  standard errors of the means and are

829 from a single experiment. Data for the  $\Delta pstA1\Delta esxN$  mutant in *Irgm1*<sup>-/-</sup> mice are representative

830 of two independent experiments. Data for the WT and  $\Delta pstA1$  mutant controls are reproduced

831 from Figure 4.

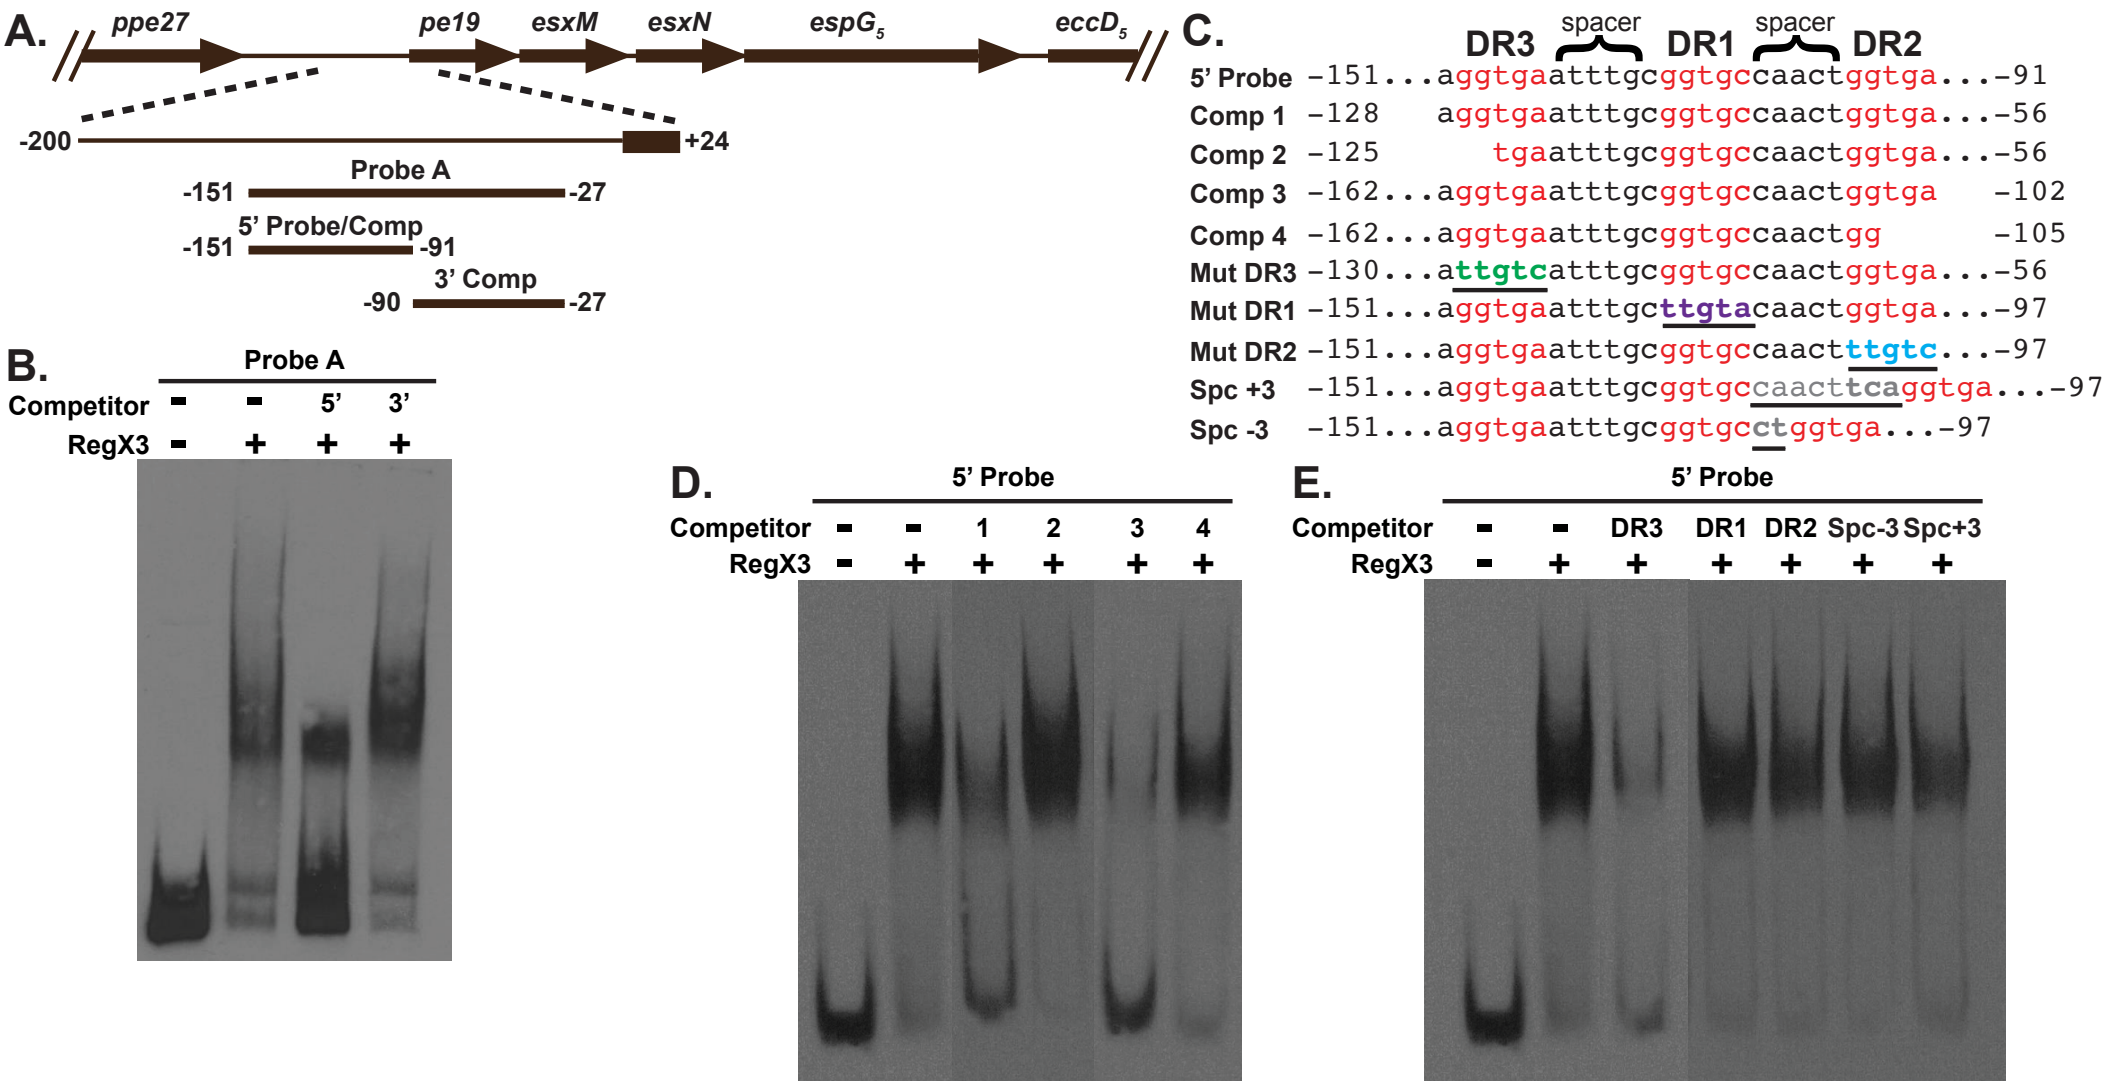

**Figure 1. Competitive EMSAs define a RegX3 binding site 5' of *pe19* in the *esx-5* locus.** (A) Schematic depicting the location of EMSA probes and competitors in the *esx-5* locus. Positions of the 5' and 3' ends of probe and competitor sequences relative to the *pe19* translational start site are indicated. (C) Sequences of the 5' Probe, truncated competitors that defined the 5' and 3' ends of the RegX3 binding site, and mutated competitors that defined sequence elements required for RegX3 binding. Direct repeats (red text) and the 5' and 3' ends of each competitor relative to the *pe19* translational start site are indicated. Mutated sequences are highlighted by underlines and green (DR3), purple (DR1), blue (DR2) or gray (spacer) text. (B, D, and E) EMSA analysis of binding between purified His<sub>6</sub>-RegX3 (0.5 μg), DIG-labeled probe (0.5 ng), and unlabeled competitors (200 ng), as indicated. Results are representative of two independent experiments.

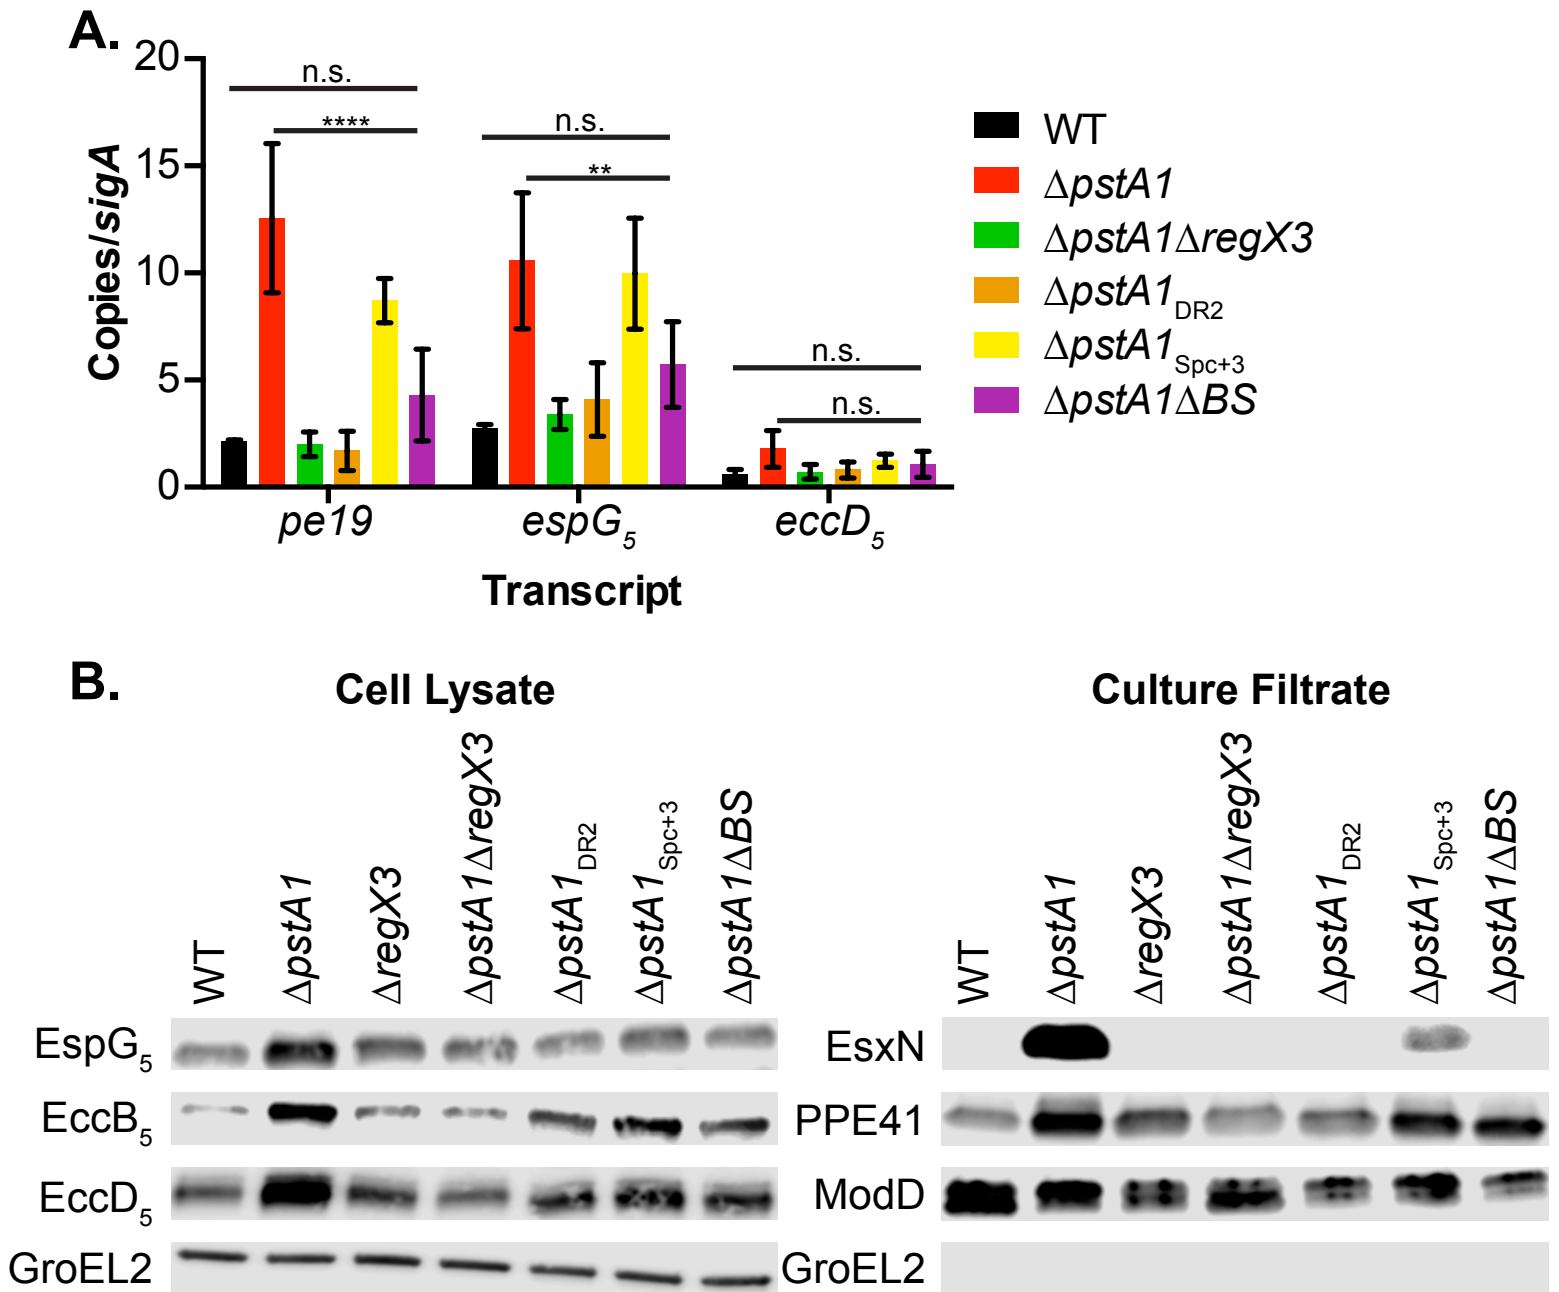

**Figure 2. Mutation of the *esx-5* RegX3 binding site suppresses over-expression of *esx-5* genes and hyper-secretion of EsxN by the  $\Delta pstA1$  mutant.** (A) Transcript abundance of *pe19*, *espG<sub>5</sub>* and *eccD<sub>5</sub>* relative to *sigA* were determined by quantitative RT-PCR for the indicated strains grown to mid-logarithmic phase in 7H9 complete medium. Results are the means  $\pm$  standard deviations for three independent experiments. \*\* $P < 0.01$ , \*\*\*\* $P < 0.0001$ . (B) The indicated strains were grown in Sauton's medium without Tween-80. Cell lysates (10  $\mu$ g) and culture filtrates (5  $\mu$ g) were separated and analyzed by Western blotting to detect the indicated proteins. Results shown are from a single experiment and are representative of two independent experiments.



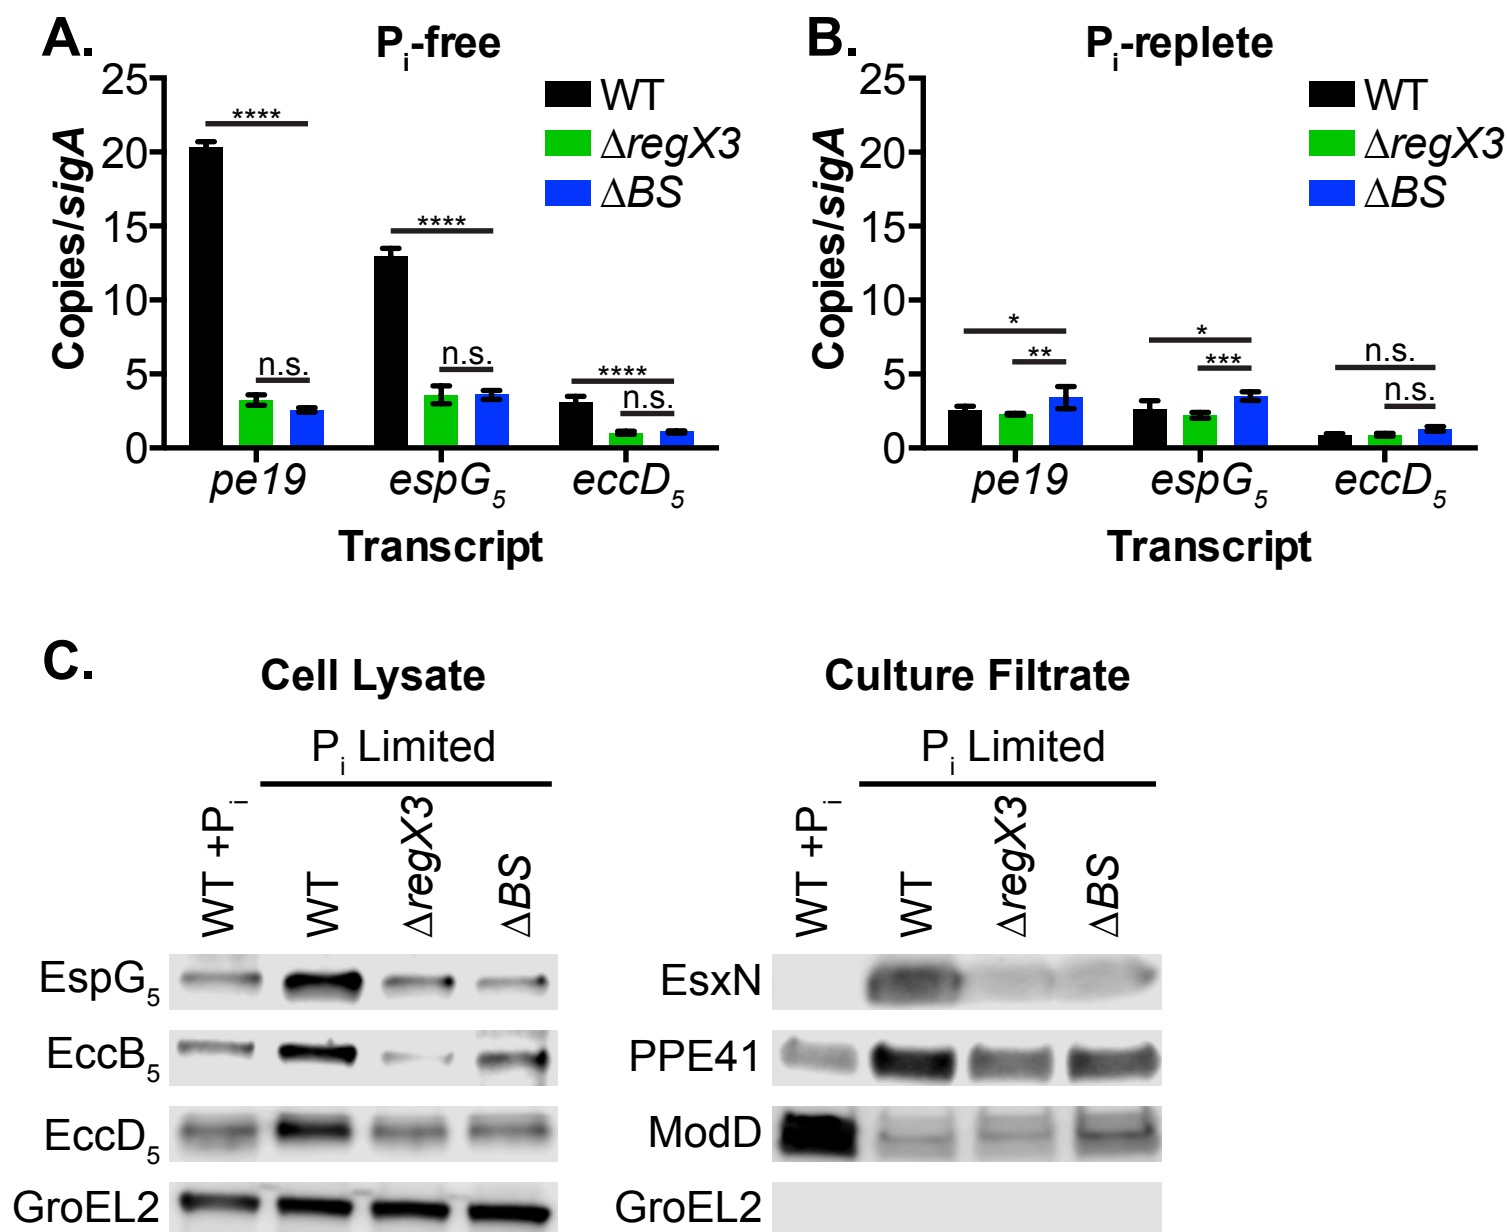

**Figure 3. Deletion of the *esx-5* RegX3 binding site prevents activation of ESX-5 secretion in response to  $P_i$  limitation.** (A&B) Transcript abundance of *pe19*, *espG<sub>5</sub>* and *eccD<sub>5</sub>* relative to *sigA* were determined by quantitative RT-PCR for the indicated strains grown to mid-logarithmic phase in  $P_i$ -free 7H9 medium (A) or  $P_i$ -replete 7H9 complete medium (B). Results are the means  $\pm$  standard deviations for three independent experiments. \* $P$ <0.05, \*\* $P$ <0.01, \*\*\* $P$ <0.001, \*\*\*\* $P$ <0.0001. (C) The indicated strains were grown in Sauton's medium without Tween-80 (WT + $P_i$ ) or in  $P_i$ -limiting (2.5  $\mu$ M  $P_i$ ) Sauton's medium without Tween-80. Cell lysates (10  $\mu$ g) and culture filtrates (5  $\mu$ g) were separated and analyzed by Western blotting to detect the indicated proteins. Results shown are from a single experiment and are representative of two independent experiments.



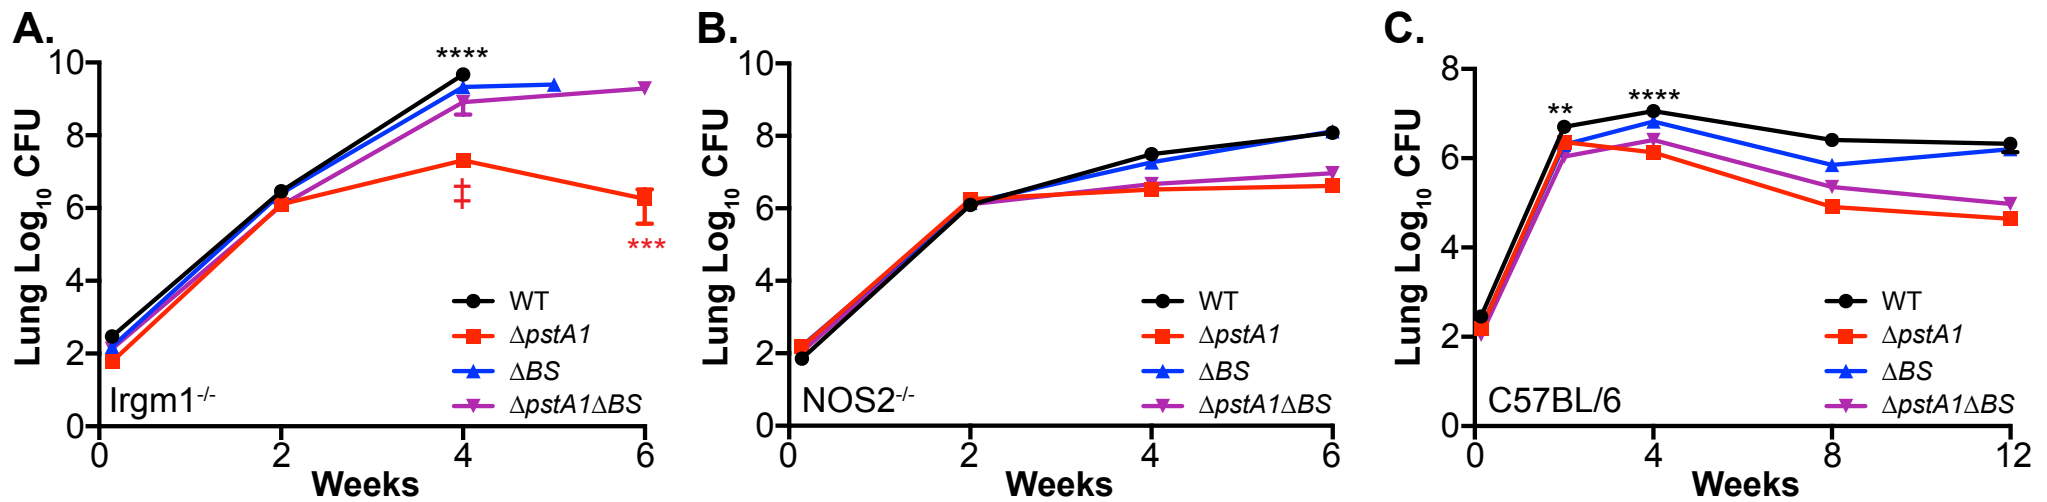

**Figure 4. Deletion of the *esx-5* RegX3 binding site in the  $\Delta pstA1$  mutant restores virulence in *Irgm1*<sup>-/-</sup> mice.** *Irgm1*<sup>-/-</sup> (A), *NOS2*<sup>-/-</sup> (B) or C57BL/6J (C) mice were infected by the aerosol route with ~100 CFU of the *M. tuberculosis* WT,  $\Delta pstA1$ ,  $\Delta BS$ , or  $\Delta pstA1\Delta BS$  strain. Groups of mice ( $n=4$ ) were sacrificed at the indicated time points and bacterial CFU were enumerated by plating serial dilutions of lung homogenates. Results are the means  $\pm$  standard errors of the means. Results for the  $\Delta pstA1\Delta BS$  mutant in *Irgm1*<sup>-/-</sup> mice are from one representative experiment of two independent experiments. All other results are from a single experiment. Data for the WT control in panel B are reproduced from (24) for comparison with the  $\Delta BS$  mutant. Asterisks indicate statistically significant differences between WT and  $\Delta BS$  (black) or between  $\Delta pstA1$  and  $\Delta pstA1\Delta BS$  (red). \*\* $P < 0.01$ , \*\*\* $P < 0.001$ , \*\*\*\* $P < 0.0001$ , ‡ $P = 0.1353$ .

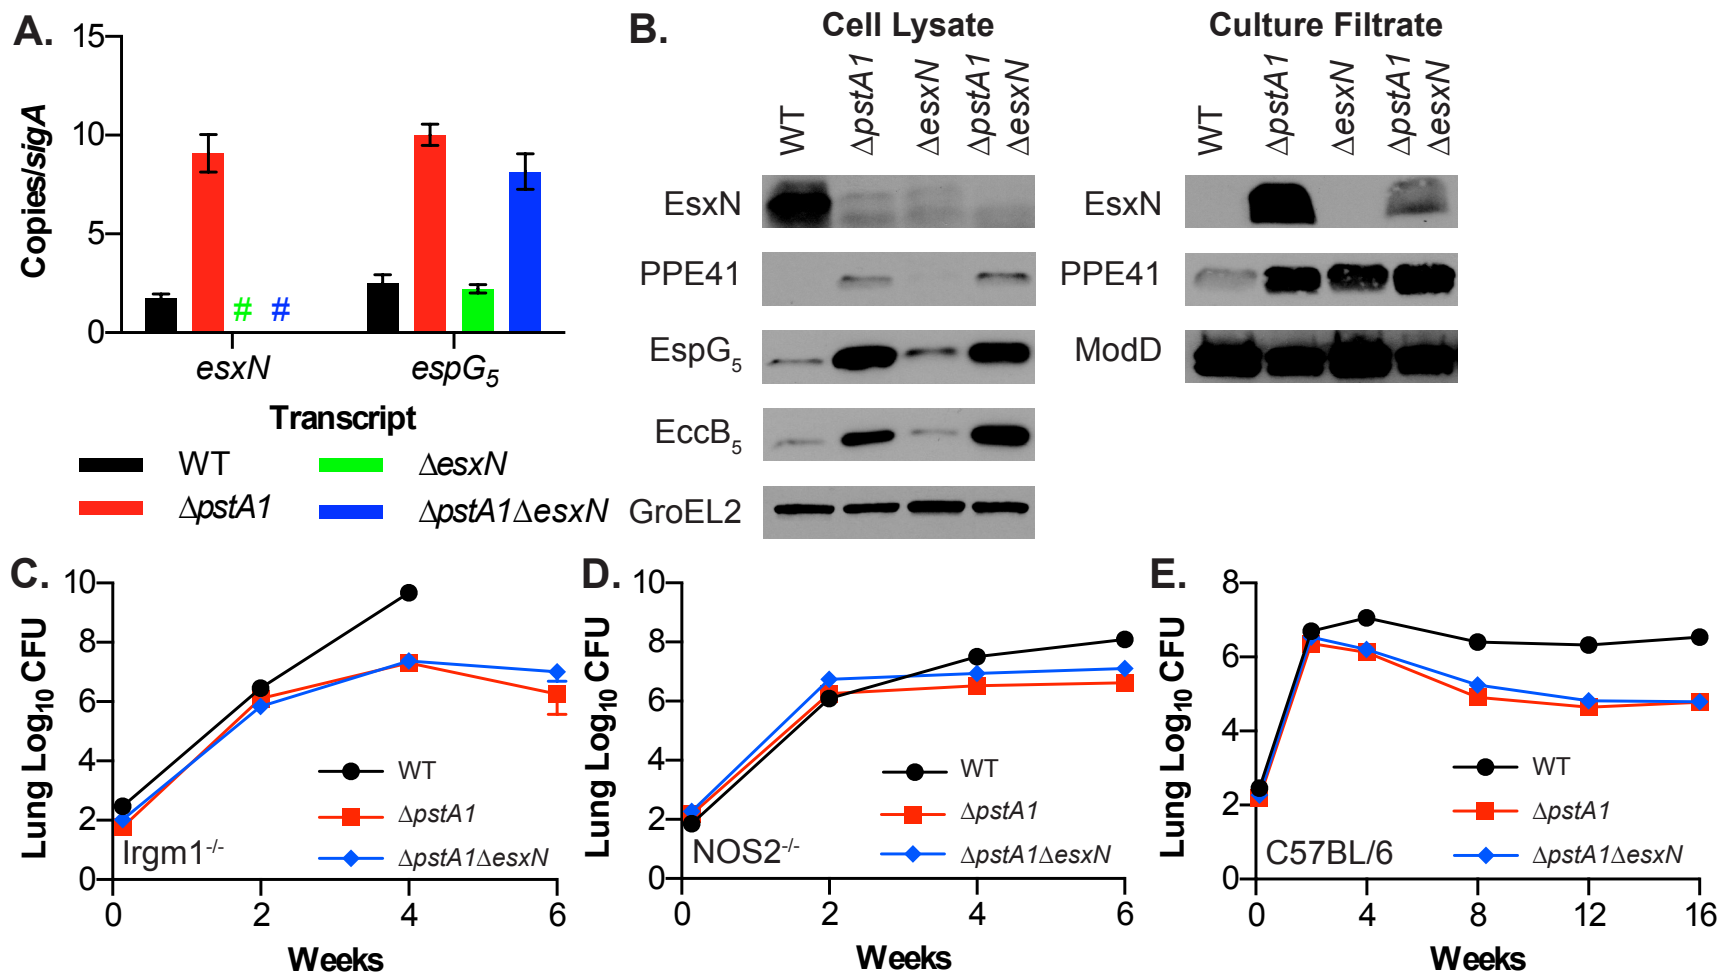

**Figure 5. Hyper-secretion of EsxN does not cause attenuation of the  $\Delta pstA1$  mutant.**

(A) Abundance of the *esxN* and *espG<sub>5</sub>* transcripts relative to *sigA* was determined by quantitative RT-PCR for the indicated strains grown to mid-logarithmic phase in 7H9 complete medium. Results are the means  $\pm$  standard deviations of 3 independent experiments. Colored # indicates the transcript was not detected in the corresponding mutant. (B) The indicated strains were grown in Sauton's medium without Tween-80. Cell lysates (10  $\mu$ g) and culture filtrates (5  $\mu$ g) were separated and analyzed by Western blotting to detect the indicated proteins. Results are from a single experiment and are representative of two independent experiments. (C-E) Aerosol infection of mice. *Irgm1<sup>-/-</sup>* (C), *NOS2<sup>-/-</sup>* (D) or C57BL6/J (E) mice were infected with  $\sim$ 100 CFU of the *M. tuberculosis* WT,  $\Delta pstA1$  or  $\Delta pstA1\Delta esxN$  strain. Groups of mice ( $n=4$ ) were sacrificed at the indicated time points and bacterial CFU were enumerated by plating serial dilutions of lung homogenates. Results are the means  $\pm$  standard errors of the means and are from single experiment. Data for the  $\Delta pstA1\Delta esxN$  mutant in *Irgm1<sup>-/-</sup>* mice are representative of two independent experiments. Data for the WT and  $\Delta pstA1$  mutant controls are reproduced from Figure 4.
